# Supplementary material for: Genome of the Avirulent Human-Infective Trypanosome—Trypanosoma rangeli
Source: PubMed Central journal article supplement (PMC4169256; doi:10.1371/journal.pntd.0003176), 2014-09-18
Supplement: pntd.0003176.s004.pdf [file pntd.0003176.s004.pdf]

TrAgol\_Choachi TCAGGAAGAGGGAGAGGTTGGCGAGGAGAGGCGGTGGCGAATCCCATGAATATCGTGGT 60  
 TrAgol\_SC58 TCAGGAAGAGGGAGAGGTTGGCGAGGAGAGGCGGTGGCGAATCCCATAAATATCGTGGT 60  
 \*\*\*\*\*  
 TrAgol\_Choachi AGAGGCGGACGTGGTGGCGAAGAGGTTATGGCGATTTGGCGGTCTGGTCTGGTGG--- 116  
 TrAgol\_SC58 AGAGGCGGACGTGGTGGCGAAGAGGTTATGGCGATTTGGCGGTCTGGTCTGGTCTGGT 120  
 \*\*\*\*\*  
 TrAgol\_Choachi --CGGTGGCGTCCGCTTCCAGAATCAAGAGCGAGAGAAGACAGTATCGTTGACTTCGCC 174  
 TrAgol\_SC58 GGCGGTGGCGTCCGCTTCCAGAATCAAGAGCGAGAGAAGACGGCCATCCGTTGACTTCGCC 180  
 \*\*\*\*\*  
 TrAgol\_Choachi AGGGATAAAAAGTACAACGCCCCGAGGGCCATCTGTAACATGATACCGTCAAGTTT 234  
 TrAgol\_SC58 AGGGAGAAAAGTACAACGCCCCGAGGGCCATCTGTAACATGATACCGTCAAGTTT 240  
 \*\*\*\*\*  
 TrAgol\_Choachi GACCCAAAGAAAAGGTGTTGCGCTATATTTGTTGTATGAACTGAATGATGGCGTCCG 294  
 TrAgol\_SC58 GACCCAAAGAAAAGGTGTTGCGCTATATTTGTTGTATGAACTGAATGATGGCGTCCG 300  
 \*\*\*\*\*  
 TrAgol\_Choachi AATTTGCAGGATGGCTGAAAGAACGGGCTTACAGGAAATGCTACGAAAGATGCAAAAA 354  
 TrAgol\_SC58 AATTTGCAGGATGGCTGAAAGAACGGGCTTACAGGAAATGCTACGAAAGATGCAAAAA 360  
 \*\*\*\*\*  
 TrAgol\_Choachi GAAAGCCCGAAGGCAAAAGTTTTCACGCTGATTTGTGCGGTTGACCGGCCAAAGTATT 414  
 TrAgol\_SC58 GAAAGCCCGAAGGCAAAAGTTTTCACGCTGATTTGTGCGGTTGACCGGCCAAAGTATT 420  
 \*\*\*\*\*  
 TrAgol\_Choachi TTGTCCCCACAACGACTCCCATCGAGGAGTTAGTCATGAGTTACCGTGAATCAAGA 474  
 TrAgol\_SC58 TTGTCCCCACAACGACTCCCATCGAGGAGTTAGTCATGAGTTACCGTGAATCAAGA 480  
 \*\*\*\*\*  
 TrAgol\_Choachi AAGGGTAACTGTATCTACTCCTATGTCCTCACCCCTGCGAGACCAGAGATCACCGCACTC 534  
 TrAgol\_SC58 AAGGGTAACTGTATCTACTCCTATGTCCTCACCCCTGCGAGACCAGAGATCACCGCACTC 540  
 \*\*\*\*\*  
 TrAgol\_Choachi AACGGCGAAGAGTACCGAATGGAGGTGAACAGCAGTAGTTGGGAAGGCTGTACAAGTCTG 594  
 TrAgol\_SC58 AACGGCGAAGAGTACCGAATGGAGGTGAAC-AGCATAGTTGGGAAGGCTGTACAAGTCTG 599  
 \*\*\*\*\*  
 TrAgol\_Choachi CTATGGAGAAAAGATGGGTGGAAGTACGTCGATATTCAGGCGGGCACAGCGGCTCCTGG 654  
 TrAgol\_SC58 CTATGGAGAAAAGATGGGTGGAAGTACGTCGATATTCAGGCGGGCACAGCGGCTCCTGG 659  
 \*\*\*\*\*  
 TrAgol\_Choachi AGGACACATTGCCACCTTTGACTGCGTTGTGCCAAAGGTGCTGACTACCACAGTGAATGG 714  
 TrAgol\_SC58 AGGACACATTGCCACCTTTGACTGCGTTGTGCCAAAGGTGCTGACTACCACAGTGAATGG 719  
 \*\*\*\*\*  
 TrAgol\_Choachi GGTGCAGATGGCACTGTTGCAGATCGACGCGTTGGTCTCTGTTGCGTACGCGCAAAATTG 774  
 TrAgol\_SC58 GGTGCAGATGGCACTGTTGCAGATCGACGCGTTGGTCTCTGTTGCGTACGCGCAAAATTG 779  
 \*\*\*\*\*  
 TrAgol\_Choachi TCTCGAAATCTCGAAGGTACAAGGCGCATGAACGCCGAAACGTTCAACAGGGTACTTTAT 834  
 TrAgol\_SC58 TCTCGAAATCTCGAAGGTACAAGGCGCATGAACGCCGAAACGTTCAACAGGGTACTTTAT 839  
 \*\*\*\*\*  
 TrAgol\_Choachi GGAGCGCTTTTCAAAAAAGAAAAA-----AAGTGTGCCACCTCCTTCAATGGTACCCGCG 889  
 TrAgol\_SC58 GGAGCGCTTTTCAAAAAAGAAAAAAGTGTGCCACCTCCTTCAATGGTACCCGCG 899  
 \*\*\*\*\*  
 TrAgol\_Choachi GAGCGGTTTACACCGTCTTGTATATCTCGGACAAAAAGCTAAAGATCCTGCCGAATTGA 949  
 TrAgol\_SC58 GAGCGGTTTACACCGTCTTGTATATCTCGGACAAAAAGCTAAAGATCCTGCCGAATTGA 959  
 \*\*\*\*\*  
 TrAgol\_Choachi GGAAATCTGAGCTGACATTTGTGCGTACTTTGCGCAAAAAATACGGTATACATCTCAT 1009  
 TrAgol\_SC58 GGAAATCTGAGCTGACATTTGTGCGTACTTTGCGCAAAAAATACGGTATACATCTCAT 983  
 \*\*\*\*\*  
 TrAgol\_Choachi TCCTGAACAGATACTGTTCCAGGTGCCGTACCAGTTCGGGGAAGAAGGTTACTTGTGCCGCC 1069  
 TrAgol\_SC58 TCCTGAACAGATACTGTTCCAGGTGCCGTACCAGTTCGGGGAAGAAGGTTACTTGTGCCGCC 1043  
 \*\*\*\*\*  
 TrAgol\_Choachi GGAAGTCTTGTATGAGATGTCCTCAGTGAACGAGACCGGTGGCAGCCGCCGAGCTGTG 1129  
 TrAgol\_SC58 GGAAGTCTTGTATGAGATGTCCTCAGTGAACGAGACCGGTGGCAGCCGCCGAGCTGTG 1103  
 \*\*\*\*\*  
 TrAgol\_Choachi TTTGCTGTACCCAAATGAACGCATGGAACGGGTCAAAAAAGCGATTGAACGCCTTAAACA 1189  
 TrAgol\_SC58 TTTGCTGTACCCAAATGAACGCATGGAACGGGTCAAAAAAGCGATTGAACGCCTTAAACA 1163  
 \*\*\*\*\*  
 TrAgol\_Choachi TGAGAATGACGCCAAGCCATGAAAATCTAAATTCATTTGGTATTATATTGGAAACAA 1249  
 TrAgol\_SC58 TGAGAATGACGCCAAGCCATGAAAATCTAAATTCATTTGGTATTATATTGGAAACAA 1223  
 \*\*\*\*\*  
 TrAgol\_Choachi CTTTTTGAAGTTTCTGGAATGTGCTGCCACCCATTCAGGTGCTTGTTCACAAGCAAA 1309  
 TrAgol\_SC58 CTTTTTGAAGTTTCTGGAATGTGCTGCCACCCATTCAGGTGCTTGTTCACAAGCAAA 1283  
 \*\*\*\*\*  
 TrAgol\_Choachi CGGTACAAAACGTCGATATTTCTTGGAGAAAACACCCAGCAAGGCTTTGCTCGGGAGCT 1369  
 TrAgol\_SC58 CGGTACAAAACGTCGATATTTCTTGGAGAAAACACCCAGCAAGGCTTTGCTCGGGAGCT 1343  
 \*\*\*\*\*  
 TrAgol\_Choachi CGGGGATTACGGCATTGCGGCAACCGAAAAGCCATTGGGGTTGACTTGTACGACGAATC 1429  
 TrAgol\_SC58 CGGGGATTACGGCATTGCGGCAACCGAAAAGCCATTGGGGTTGACTTGTACGACGAATC 1403  
 \*\*\*\*\*  
 TrAgol\_Choachi GCAACAGGGGAAGAAGGCACTGGATGCGATTAAGAATCATTGGCAAAAGATGAACGCCG 1489  
 TrAgol\_SC58 GCAACAGGGGAAGAAGGCACTGGATGCGATTAAGAATCATTGGCAAAAGATGAACGCCG 1463  
 \*\*\*\*\*  
 TrAgol\_Choachi CGTGACGCCAGCATGGGTGCAGCATGCGGGAAGCCTAGATGACGTCAAAAAATTCGCTC 1549  
 TrAgol\_SC58 CGTGACGCCAGCATGGGTGCAGCATGCGGGAAGCCTAGATGACGTCAAAAAATTCGCTC 1523  
 \*\*\*\*\*  
 TrAgol\_Choachi CAAGAACGCGTTTGCCTTTGCTTTTCTGCGCCACTTTGATAAAGAGTTGTACAGAAGTTT 1609  
 TrAgol\_SC58 CAAGAACGCGTTTGCCTTTGCTTTTCTGCGCCACTTTGATAAAGAGTTGTACAGAAGTTT 1583  
 \*\*\*\*\*

TrAgol\_Choachi GAAGACAACGTGGACAAATAAGGACATCTTAAGTCAAGTGGTGGTAAAGGATTTGACTGG 1669  
 TrAgol\_SC58 GAGGACAACGTGGACAAATAAGGACATCTTAAGTCAAGTGGTGGTAAAGGATTTGACTGG 1643  
 \* \* \* \* \*  
 TrAgol\_Choachi GTCCCGTGAACACCAACTGTCATGGCAGTGGCGCAGCAGGTGTGCGCCAAAGGTGGCCA 1729  
 TrAgol\_SC58 GCCCGTGAAACACCAATTGTGTCATGGCAGTGGCGCAGCAGGTGTGCGCCAAAGGTGGCCA 1703  
 \* \* \* \* \*  
 TrAgol\_Choachi GCTGAATTGGGTGCTGGACATCAATAAATTTGTGCCCGTCACTTGCCCTCCAAAATTGGATC 1789  
 TrAgol\_SC58 GCTGAATTGGGTGCTGGACATCAATAAATTTGTGCCCGTCACTTGCCCTCCAAAATTGGATC 1763  
 \* \* \* \* \*  
 TrAgol\_Choachi CGCAGGAGTATTGATCATTGGAGCCGATATAGGGAGAGATCAGAGGGAGCTGCGTACCGA 1849  
 TrAgol\_SC58 CGCAGGAGTATTGACCATTTGGAGCCGATATAGGGAGAAATCAGAGGGAGCTGCGTACCGA 1823  
 \* \* \* \* \*  
 TrAgol\_Choachi CGAATCCACGGTCAACAAGAAATTTATACGGTGGCCTTTGTGGCCTTCCATGCTTGTGG 1909  
 TrAgol\_SC58 CGAATCCACGGTCAACAAGAAATTTATACGGTGGCCTTTGTGGCCTTCCATGCTTGTGG 1883  
 \* \* \* \* \*  
 TrAgol\_Choachi AACACGATGGGAAACTTACTGCGACCATTACCAGTGGATGGCCGCAAGCGAAGTTTATT 1969  
 TrAgol\_SC58 AACACGATGGGAAACTTACTGCGACCATTACCAGTGGATGGCCGCAAGCGAAGTTTATT 1943  
 \* \* \* \* \*  
 TrAgol\_Choachi CGCTCAACGCCCGCAAGCAGAGGGCTCAAGTGTCTCGGAAAAAGCCTTCATGCCCTCTGA 2029  
 TrAgol\_SC58 CGCTCAAGCCCGCAAGCAGAGGGCTCAAGTGTCTCGGAAAAAGCCTTCATGCCCTCTGA 2003  
 \* \* \* \* \*  
 TrAgol\_Choachi GGTGCTCTCAGGAAAGCTGAGAGGCTTCTTGACGAGGCGAGGCGCCACTTTTGGACAA 2089  
 TrAgol\_SC58 GGTGCTCTCAGGAAAGCTGAGAGGCTTCTTGACGAGGCGAGGCGCCACTTTTGGACAA 2063  
 \* \* \* \* \*  
 TrAgol\_Choachi AGGTTTGCAAACTTCTGCGGTGCTGCTCGTGGCTGTGCGTCCGAGGGTGGAGCTGTT 2149  
 TrAgol\_SC58 AGGTTTGCAAACTTCTGCGGTGCTGCTCGTGGCTGTGCGTCCGAGGGTGGAGCTGTT 2123  
 \* \* \* \* \*  
 TrAgol\_Choachi GGCCGCAAGAGCAGCAGCTGGACCTGCTAAGTGGGTCTTAAAA---CGTCCTGTG 2204  
 TrAgol\_SC58 GGCCGCAAGAGCAGCAGCTGGACCTGCTAAGTGGGTCTTAAAAGAAACGTCCTGTG 2183  
 \* \* \* \* \*  
 TrAgol\_Choachi GGGAGTGGTGGCGTCCGAGCGCTACCAACATACACGCTTTGCCCGCCACACCTAAGGA 2264  
 TrAgol\_SC58 GGGAGTGGTGGCGTCCGAGCGCTACCAACATACACGCTTTGCCCGCCACACCTAAGGA 2243  
 \* \* \* \* \*  
 TrAgol\_Choachi GCCCGACACGCTATGCAATGTTCCACGCGGCTTTGTGACGCGTGAGGGGACGACTCGAA 2324  
 TrAgol\_SC58 GCCCGACACGCTATGCAATGTTCCACGCGGCTTTGTGACGCGTGAGGGGACGACTCGAA 2303  
 \* \* \* \* \*  
 TrAgol\_Choachi ATTTGGCGAGTTATTTTTTTTAAACGGTGCAGACTGCACGCTTGGCCACGCGCGGCCAC 2384  
 TrAgol\_SC58 ATTTGGCGAGTTATTTTTTTTAAACGGTGCAGACTGCACGCTTGGCCACGCGCGGCCAC 2363  
 \* \* \* \* \*  
 TrAgol\_Choachi GCTGTACGTGCTGTTGGGAGGAGAAAAAGCTTTTGTGCTGGAGGAGATTACAGTACTGCT 2444  
 TrAgol\_SC58 GCTGTACGTGCTGTTGGGAGGAGAAAAAGCTTTTGTGCTGGAGGAGATTACAGTACTGCT 2423  
 \* \* \* \* \*  
 TrAgol\_Choachi GCATGGGATGTGTTTCTGTACCCGAACAAGGCGGATGGCCTCCCGTTGCCACTGCCGCT 2504  
 TrAgol\_SC58 GCATGGGATGTGTTTCTGTACCCGAACAAGGCGGATGGCCTCCCGTTGCCACTGCCGCT 2483  
 \* \* \* \* \*  
 TrAgol\_Choachi GAAGTGCAGCTCGGAGTACTCACGGAAGTTGTGTCTTTGCGCGGTGTCAAAAGCTTTC 2564  
 TrAgol\_SC58 GAAGTGCAGCTCGGAGTACTCACGGAAGCTTGTGTCTTTGCGCGGTGTCAAAAGCTTTC 2543  
 \* \* \* \* \*  
 TrAgol\_Choachi CAAGGAGCTGCGCGGCAAGCTGCACCTACCTGTAGTTGGCCGCTCTCTGCTGGCACGAA 2624  
 TrAgol\_SC58 CAAGGAGCTGCGCGGCAAGCTGCACCTACCTGTAGTTGGCCGCTCTCTGCTGGCACGAA 2603  
 \* \* \* \* \*  
 TrAgol\_Choachi GGCCAAGTGCATCTGCCACAACGCGCTTGTCCAGGAGTGCCTGACACGGGGCGGACGGC 2684  
 TrAgol\_SC58 GGCCAAGTGCATCTGCCACAACGCGCTTGTCCAGGAGTGCCTGACACGGGGCGGACGGC 2663  
 \* \* \* \* \*  
 TrAgol\_Choachi GCCAAGGTGTGCGTGTGTAATG 2708  
 TrAgol\_SC58 GCCAAGGTGTGCGTGTGTA--- 2684  
 \* \* \* \* \*

TrDcl1\_Choachi ---TATTTAGTTGGGTGGGACATTTTTTTATTTTATTTTGTCTTCCAAGGACTT 56  
TrDcl1\_SC58 CGATTATTTAGTTGGGTGGGACATTTTTTTGTTTTATTTTGTCTTCCAAGGACTT 60  
\*\*\*\*\*  
TrDcl1\_Choachi TTCAACATGCATGGGGCGGTGATGGCGGGTCACTGTGGGGAGTTGCTGCGGTTGTG 116  
TrDcl1\_SC58 TTCAACATGCATGGGGCGGTGATGGCGGGTCACTGTGGGGAGTTGCTGCGGTTGTG 120  
\*\*\*\*\*  
TrDcl1\_Choachi GATGTGCGCCGACGACGAGGCTGATGGACGCCCTTGAGAATGTTGGGACGCTGATAGGGAT 176  
TrDcl1\_SC58 GATGTGCGCCGACGACGAGGCTGGTGGACGCCCTTGAGAATGTTGGGACGCTGATAGGGAT 180  
\*\*\*\*\*  
TrDcl1\_Choachi GAAGGAGCTGCGGGAATGCTGGGGTCTGTTCGCCGCATGCTGAGGCACTCAAAGGGA 236  
TrDcl1\_SC58 GGAGGAGCTGCGGGAATGCTGGGGTCTGTTCGCCGCATGCTGAGGCACTCAAAGGGA 240  
\*\*\*\*\*  
TrDcl1\_Choachi GGGATCCGGCGTCAGTGGCCCTCACTGGCGGGGAGAAGCTCTTGAAGCGCTTGGCTC 296  
TrDcl1\_SC58 GGGATCCGGCGTCAGTGGCCCTCACTGGCGGGGAGAAGCTCTTGAAGCGCTTGGCTC 300  
\*\*\*\*\*  
TrDcl1\_Choachi CGAATACGCCTTCCTTTTATTTCCCAAGTGAGGCACCGTAAGCTTACCAACGTAACGCG 356  
TrDcl1\_SC58 CGAATACGCCTTCCTTTTATTTCCCAAGTGAGGCACCGTAAGCTTACCAACGTAACGCG 360  
\*\*\*\*\*  
TrDcl1\_Choachi TGTACTCCTCTCCTCTGACACGCTTGACCCGGAGTTGGAAGTTTCTCGGCACCAAGTT 416  
TrDcl1\_SC58 TGTACTCCTCTCCTCTGACACGCTTGACCCGGAGTTGGAAGTTTCTCGGCACCAAGTT 420  
\*\*\*\*\*  
TrDcl1\_Choachi GGCGGCACGCAAGGTGTTCTGCCTTTTTTGGCGCTGCTGGTGTGGGCGCGGAGCATTCC 476  
TrDcl1\_SC58 GGCGGCACGCAAGGTGTTCTGCCTTTTTTGGCGCTGCTGGTGTGGGCGCGGAGCATTCC 480  
\*\*\*\*\*  
TrDcl1\_Choachi TGCAGCGCTTCCTCCACTTCCCGTGTGCGCAGTGTGATGAGCACCAGGGGCTACGC 536  
TrDcl1\_SC58 TGCAGCGCTTCCTCCACTTCCCGTGTGCGCAGTGTGATGAGCACCAGGGGCTACGC 540  
\*\*\*\*\*  
TrDcl1\_Choachi GGTGCCATTGCCAGCATTGTCCTCGCTGTGCCCGAGGAGTGTGGTGGGTTTC 596  
TrDcl1\_SC58 GGTGCCATTGCCAGCATTGTCCTCGCTGTGCCCGAGGAGTGTGGTGGGTTTC 600  
\*\*\*\*\*  
TrDcl1\_Choachi ACATGAGCAGCAGATTGAGTTGATGGTGAAGGAACGGAACAGCGCGGAGTATGTGTGTC 656  
TrDcl1\_SC58 ACATGAGCAGCAGATTGAGTTGATGGTGAAGGAACGGAACAGCGCGGAGTATGTGTGTC 660  
\*\*\*\*\*  
TrDcl1\_Choachi GCGGGAGCGGAAGAGTCGAATCCAATGAGGATGACGGGGTGCCTTACCGCGTGCGGGT 716  
TrDcl1\_SC58 GCGGGAGCGGAAGAGTCGAATCCAATGAGGATGACGGGGTGCCTTACCGCGTGCGGGT 720  
\*\*\*\*\*  
TrDcl1\_Choachi GAGGTGCGGGGAGGAAGCAGAGTCGTCGAGAAAGGGGTGACGCTTGTGGATTCTACGC 776  
TrDcl1\_SC58 AAGTGTGGGGAGGAAGCAGAGTCGTCGAGAAAGGGG-CGACGCTTGTGGATTCTACGC 779  
\*\* \* \* \* \* \*  
TrDcl1\_Choachi CATTGTCATGGGGGAGGGGAAGAAGATTGTTTCGCGTGCAAAAGTGGTCAAAAAGATGCA 836  
TrDcl1\_SC58 CATTGTCATGGGGGAGGGGAAGAAGATTGTTTCGCGTGCAAAAGTGGTCAAAAAGATGCA 838  
\*\*\*\*\*  
TrDcl1\_Choachi GAAAGAGCAGGTTACATTCTCCACGGCTAATATTAAGATGGATGCATAAGGTTTCGTC 896  
TrDcl1\_SC58 GAAAGAGCAGGTTAAATTCTCCATGGCTAATATTAAGATGGATGCATAAGGTTTCGTC 898  
\*\*\*\*\*  
TrDcl1\_Choachi CTTGCTGCGCTTTCATCCTTCATACAAGGACGCCCTGCCACAGGACTTATGGCAAAGGT 956  
TrDcl1\_SC58 CTTGCTGCGCTTTCATCCTTCATACAAGGACGCCCTGCCACAGGACTTATGGCAAAGGT 958  
\*\*\*\*\*  
TrDcl1\_Choachi GATTTACTGCGAGGATGGATGCCGCTGAGCGAGATGTGTCGCATCCTGGCAGCGCAGTC 1016  
TrDcl1\_SC58 GATTTACTGCGAGGATGGATGCCGCTGAGCGAGATGTGTCGCATCCTGGCAGCGCAGTC 1018  
\*\*\*\*\*  
TrDcl1\_Choachi GGCGGACGCGTGCGGGCTTGTGCCATCGCTGGATATGCTGACGAGCTGCTTGAGAACCA 1076  
TrDcl1\_SC58 GGCGGACGCGTGCGGGCTTGTGCCATCGCTGGATATGCTGACGAGCTGCTTGAGAACCA 1078  
\*\*\*\*\*  
TrDcl1\_Choachi CGACCACTTCAACGGTATGAGGTGGGCGTTTTCGGGGGTTGCGGGAGGCGCATTTAATGG 1136  
TrDcl1\_SC58 CGACCACTTCAACGGTATGAGGTGGGCGTTTTCGGGGGTTGCGGGAGGCGCATTTAATGG 1138  
\*\*\*\*\*  
TrDcl1\_Choachi TCAGTTGTGCGCCCGTGCAGCGTACGCCACCAGGGCTTTCGATCACTATCCACACGCAT 1196  
TrDcl1\_SC58 TCAGTTGTGCGCCCGTGCAGCGTACGCCACCAGGGCTTTCGATCACTATCCACACGCAT 1198  
\*\*\*\*\*  
TrDcl1\_Choachi CTTTGAGAAGTTTGTGACTGTACAAACCCGAACGCGTGCACCACTACGCGTGGGTCTC 1256  
TrDcl1\_SC58 CTTTGAGAAGTTTGTGACTGTACAAACCCGAACGCGTGCACCACTACGCGTGGGTCTC 1258  
\*\*\*\*\*  
TrDcl1\_Choachi CTTGGGTGAAAAGAGGCTGCTCGACCCCGGGCTTCGCAAGGGGTTGTACATACTGCACCA 1316  
TrDcl1\_SC58 CTTGGGTGAAAAGAGGCTGCTCGACCCCGGGCTTCGCAAGGGGTTGTACATACTGCACCA 1318  
\*\*\*\*\*  
TrDcl1\_Choachi GGAAATGCGATTGCTTTGGTGTTCCTCAGAATTGCTTATAGAATTTAGCCGCTACCA 1376  
TrDcl1\_SC58 GGAAATGCGATTGCTTTGGTGTTCCTCAGAATTGCTTATAGAATTTAGCCGCTACCA 1378  
\*\*\*\*\*  
TrDcl1\_Choachi ATTGCAAAACCACTGGAGGAACAGTACGACGAGAAGCTTGGGGTGGACAGGCCATTGCA 1436  
TrDcl1\_SC58 ATTGCAAAACCACTGGAGGAACAGTACGACGAGAAGCTTGGGGTGGACAGGCCATTGCA 1438  
\* \* \* \* \*  
TrDcl1\_Choachi CTTTTGGAGCTTTGCTTTGTGCGGAGTGCAGGATGCCGAGATGACAGTGTCCAGGC 1496  
TrDcl1\_SC58 CTTTTGGAGCTTTGCTTTGTGCGGAGTGCAGGATGCCGAGATGACAGTGTCCAGGC 1498  
\*\*\*\*\*  
TrDcl1\_Choachi CCCACCGGATGGGGGCGCGACGCACTGGTTCCTCTTCTCGAATCGCAAGGAGGATCC 1556  
TrDcl1\_SC58 CCCACCGGATGGGGGCGCGACGCACTGGTTCCTCTTCTCGAATCGCAAGGAGGATCC 1558  
\*\*\*\*\*

TrDcl1\_Choachi TrDcl1\_SC58 TCGCGTGGAGCATTTCGCATATCCACGGTATTATTTACGGGCCGTGTGGCAACGCTGTG 1616  
TGCGGTGGAGCATTTCGCATATCCACGGTATTATTTACGGGCCGTGTGGCAACGCTGTG 1618  
\*\*\*\*\*  
TrDcl1\_Choachi TrDcl1\_SC58 CCGCGGCGCCCGCACAAGGTTGAGCAGGGAACGAGACTGCCACGACGGCAGAAGAAGC 1676  
CCGCGGCGCCCGCACAAGGTTGAGCAGGGAACGAGACTGCCACGACGGCAGAAGAAGC 1678  
\*\*\*\*\*  
TrDcl1\_Choachi TrDcl1\_SC58 GGATCCCCCGGCGTGGTTTTCAGCCGTTGCGAGTTTTTGAAGAACACCGAGCCCGCTGG 1736  
AGATCCCCCGGCGTGGTCTTCAGCCGTTGCGAGTTTTTGAAGAACACTGAGCCCGCTGG 1738  
\*\*\*\*\*  
TrDcl1\_Choachi TrDcl1\_SC58 TTTCTCGGATGAGGAGGTGACTTGCCTCTTTGGCTCCGACCGGACAGCTGCGAACAAGA 1796  
TTTCTCGGATGAGGAGGTGACTTGCCTCTTTGGCTCCGACCGGACAGCTGCGAACAAGA 1798  
\*\*\*\*\*  
TrDcl1\_Choachi TrDcl1\_SC58 CGAAGGCGGTGAGGGGGCGGCGCGCAGGAAGAGGAGCTTGAATTTTCCGTGGTGTCTAC 1856  
CGAAGGCGGTGAGGGGGCGGCGCGCAGGAAGAGGAGCTTGCATTTTCCGTGGTGTCTAC 1858  
\*\*\*\*\*  
TrDcl1\_Choachi TrDcl1\_SC58 CGCTACGATCTCGTGGATATCGAAGGTGCGCAGGCGAGGCTGCTACTTTGTGCGAGAG 1916  
CGCTACGATCTCGTGGATATCGTGGTGGCAGGCGAGGCTGCTACTTTGTGCGAGAG 1918  
\*\*\*\*\*  
TrDcl1\_Choachi TrDcl1\_SC58 TCCAGAGCTGCAAGTTACGCGTGTCTCGTTTCCAAGTATCCGCCCGGCGGAGGCTCTTT 1976  
TCCAGAGCTGCTAGTTACGCGTGTCTCGTTTCCAAGTATCCGCCCGGCGGAGGCTCTTT 1978  
\*\*\*\*\*  
TrDcl1\_Choachi TrDcl1\_SC58 TTTTAAACCGTCAAAAACATTTGCCGAGTTTAAAGAGTGGGTGCTGGCCAGGGGCTTGT 2036  
TTT-AAACCGTCAAAAACATTTGCCGAGTTTAAAGAGTGGGTGCTGGCCAGGGGCTTGT 2037  
\*\*\*  
TrDcl1\_Choachi TrDcl1\_SC58 GTACAGGAGCCTCCCTGCGGCGGATGACACCCGGGAGGAGCTG----- 2079  
GTCCAGGAGCCTCCCTGCGGCGGATGACACCCGGGAGGAGCTGTACGAGATCCGTGGGCG 2097  
\*\*  
TrDcl1\_Choachi TrDcl1\_SC58 -----GAGGACAT 2087  
TGCTCTCTCGAACCAGGACTTTATCAACAGCGTTGCGAAGGAATTGGAGCTGGAGGACAT 2157  
\*\*\*\*\*  
TrDcl1\_Choachi TrDcl1\_SC58 TCCCGACCCCAAGGCGCTTTCGACGCGCTTGACCCGCGAGTGTGAAAGCAGGGAATGAA 2147  
TCCCGACCCCAAGGCGCTTTCGACGCGCTTGACCCGCGAGTGTGAAAGCAGGGAATGAA 2217  
\*\*\*\*\*  
TrDcl1\_Choachi TrDcl1\_SC58 CTACGAAATCTTGGATTTTGTTGGCGACGCTGTGATGGACTTTTGGTGGCGTTTGACAG 2207  
CTACGAAATCTTGGATTGTTGGCGACGCTGTGATGGACTTTTGGTGGCGTTTGACAG 2277  
\*\*\*\*\*  
TrDcl1\_Choachi TrDcl1\_SC58 TTTCTGCTGGGGGAACCCCTGGAATACACACGCTCATCGCAGAGCTATGCTCCAATAAGCT 2267  
TTTCTGCTGAGGGAACCCCTGGAATACACACGCTCATCGCAGAGCTATGCTCCAATAAGCC 2337  
\*\*\*\*\*  
TrDcl1\_Choachi TrDcl1\_SC58 GCTTGCCCATCTCATCCCTGTCTCGTGTGAGTGAAGACTCTCTCAGATTTATGTGGACCT 2327  
GCTTGCCCATCTCATCCCTGTCTCGTGTGAGTGAAGACTCTCTCAGATTTATGTGGACCT 2397  
\*\*\*\*\*  
TrDcl1\_Choachi TrDcl1\_SC58 GCCCACGAAGGTGAAGGCAGACATTTGAGGAGCCATTTCTGGGTGCTGTGACTGCAGTCA 2387  
GCCCACGAAGGTGAAGGCAGACATTTGAGGAGCCATTTCTGGGTGCTGTGACTGCAGTCA 2457  
\*\*\*\*\*  
TrDcl1\_Choachi TrDcl1\_SC58 CATGGGGCTTGACAGGTTGCGTCAACAGCTACGGCACTTCTTCGGCCGCATCCCCGCCG 2447  
CATGGGGCTTGACAGGTTGCGTCAACAGCTACGGCACTTCTTCGGCCGCATCCCCGCCG 2517  
\*\*\*\*\*  
TrDcl1\_Choachi TrDcl1\_SC58 CATGGCGAGGGGGGGGGGGG-CATGCTCCATCCACTGAAGTTGCTGGAG----- 2497  
CATGGCGAGGGGGGGGGGGG-CATGCTCCATCCACTGAAGTTGCTGGAG----- 2577  
\*\*\*\*\*  
TrDcl1\_Choachi TrDcl1\_SC58 -----GAGCGATACAAGTACGCC 2515  
GAGCCTGTCCATACCTTTCAGCAACACAGAGCTGCTGGAGGAGCGATACAAGTACGCC 2637  
\*\*\*\*\*  
TrDcl1\_Choachi TrDcl1\_SC58 TGCACCACATTAATTGATAAACGGAGCGCTGAGATATTCGTGACCCCGCAACCTCTTCC 2575  
TGCACCACATTAATTGATAAACGGAGCGCTGAGATATTCGTGACCCCGCAACCTCTTCC 2697  
\*\*\*\*\*  
TrDcl1\_Choachi TrDcl1\_SC58 CTTGGAGGTCCTCCACATGAGCCACTACGCTCAGTACCCTTCAAGCGTATTGAGGACAAG 2635  
CTTGGAGGTCCTCCACATGAGCCACTACGCTCAGTACCCTTCAAGCGTATTGAGGACAAG 2757  
\*\*\*\*\*  
TrDcl1\_Choachi TrDcl1\_SC58 GCATACGCGACGCACTTCACGACAGGCAACGCTGACTCTACCGGCAATTTCTTCCATC 2695  
GCATACGCGACGCACTTCACGACAGGCAACGCTGACTCTACCGGCAATTTCTTCCATC 2817  
\*\*\*\*\*  
TrDcl1\_Choachi TrDcl1\_SC58 GATACCCCGTGTCTTCAACCGGATTTCTGGACGCTTTGCCAATGGTGCAACTGCCTTT 2755  
GATACCCCGTGTCTTCAACCGGATTTCTGGACGCTTTGCCAATGGTGCAACTGCCTTT 2877  
\*\*  
TrDcl1\_Choachi TrDcl1\_SC58 ACCAACGAAATCATTACAAGAGAAACGACCTTGCATGATGTGGATGGACTAAGCGTC 2815  
ACCAACGAAATCATTACAAGAGAAACGACCTTGCATGATGTGGATGGACTAAGCGTC 2937  
\*\*\*\*\*  
TrDcl1\_Choachi TrDcl1\_SC58 ACTTCTGCGGCATTGCAAGATGATTTGGGAGTGGTTTTGCAACACACTCGCATCCCCG 2875  
ACTTCTGCGGCATTGCAAGATGATTTGGGAGTGGTTTTGCAACACACTCGCATCCCCG 2997  
\*\*\*\*\*  
TrDcl1\_Choachi TrDcl1\_SC58 TCGGCGATGCTTCTCCTGGACTGCTCGGCGATGTCGTTTATGTCGAATAAGATGAAGCGC 2935  
TCGGCGATGCTTCTCCTGGACTGCTCGGCGATGTCGTTTATGTCGAATAAGATGAAGCGC 3057  
\*\*\*\*\*  
TrDcl1\_Choachi TrDcl1\_SC58 CCATGCCACATCCACTTTCCACAGGCGGCTACAAGTCTACAACGGATGCTGCCGCTTATA 2995  
TCATGCCACATCCACTTTCCACAGGCGGCTACAAGTCTACAACGGATGCTGCCGCTTATA 3117  
\*\*\*\*\*  
TrDcl1\_Choachi TrDcl1\_SC58 ACGGATCTTCGACAGCACATTTTGGGGCGGCTGCTCATACGACTCGGCTGGTGTATGTC 3055  
ACTGATCTTCGACAGCACATTTTGGGGCGGCTGCTCATACGACTCGGCTGGTGTATGTC 3177  
\*\*

TrDcl1\_Choachi CTTGGTTTCCATGGGACTGAGGGAAGCGGGGAACCCGACGTGTCATTGGGAAAATTGTT 3115  
TrDcl1\_SC58 CTTGGTTTCCATGGGACGGAGGGAAGCGGGGAACCCGACGTGTCATTGGTAAAAATTGTT 3237  
\*\*\*\*\*  
TrDcl1\_Choachi TTTGCGACGGCGTACGCGATGCGTTGGCCCCCAAAAAAGACATATGTGAAGATCCC 3175  
TrDcl1\_SC58 TTTGCGACGGCGTACGCGATGCGTTGGCCCCCAAAAAAGACATATGTGAGGATCCC 3297  
\*\*\*\*\*  
TrDcl1\_Choachi GTTTGGACTGTCTGGATCTGCGCAGTATGCTGTGCTTTGGGGAGATCTGTGCTGCGATG 3235  
TrDcl1\_SC58 GTTTGGACTGTCTGGATCTGCGCAGTATGCTGTGCTTTGGGGAGACCTGTGCTGCGATG 3357  
\*\*\*\*\*  
TrDcl1\_Choachi CGGCGGTATGCTATTCACCACCTACTAGCGTGGCGAGGCGCCTTGCAAAGAGGCATAT 3295  
TrDcl1\_SC58 CGGCGGTATGCTATTCCTACTAGCGTGGCGAGGCGCCTTGCAAAGAGGCATAT 3417  
\*\*\*\*\*  
TrDcl1\_Choachi TTTGTGAGTTGGTCCCAACTCTTGTGTTTTGGATAACGCGGCCTCGCCAGCGACCAT 3355  
TrDcl1\_SC58 TTTGTGAGTTGGTCCCAACTCTTGTGTTTTGGACAACGCGGCCTCGCCAGTGACCAT 3477  
\*\*\*\*\*  
TrDcl1\_Choachi GACGTTCTCATGAAGGTGCAGTGGGCTCAAAGGATGCAGCCGATGTAGTTGGTAAGTTT 3415  
TrDcl1\_SC58 GACGTTCTCATGAAGGTGCAGTGGGCTCAAAGGATGCAGCCGATGTAGTTGGTAAGTTT 3537  
\*\*\*\*\*  
TrDcl1\_Choachi GTTTGGTGTCCCGTGAGCAGGCTGGTGAAGTCAAGGAGGAGTCCGTTGGGCGTGGTGGAG 3475  
TrDcl1\_SC58 GTTTGGTGTCCCGTGAGCAGGCTGGTGAAGTCAAGGAGGAGTCCGTTGGGCGTGGTGAAG 3597  
\*\*\*\*\*  
TrDcl1\_Choachi TCTGTGAGCGTGTAGTGGGTGAAGAGAGAATGAAGCCAAAGCAGTTCTTTATTGAGCGA 3535  
TrDcl1\_SC58 TCTGTGAGCGTGTAGTGGGTGAAGAGAGAATGAAGCCAAAGCAGTTCTTTATTGAGCGA 3657  
\*\*\*\*\*  
TrDcl1\_Choachi GTCACGCCGTTGCGGGAGAAGAGTTCTTTGACCCGGGGTTTTGGAATCGCGTCATTGAT 3595  
TrDcl1\_SC58 GTCACGCCGTTGCGGGAGAAGAGTTCTTTGACCCGGGGTTTTGGAATCGCGTCATTGAT 3717  
\*\*\*\*\*  
TrDcl1\_Choachi ACCTCACTGGTGGAGAGCCGAAAGCTGCGGATGTACCTGAACGACAAGTACGACATGGTG 3655  
TrDcl1\_SC58 ACCTCACTGGTGGAGAGCCGAAAGCTGCGGATGTACCTGAACGACAAGTACGACATGGTG 3777  
\*\*\*\*\*  
TrDcl1\_Choachi TATGGTAGGGAGTACCGCCACTCTTCCTGGACACCGTGTGCTTGTCTCAGGGCATAATA 3715  
TrDcl1\_SC58 TATGGTAGGGAGTACCGCCACTCTTCCTGGACACCGTGTGCTTGTCTCAGGGCATAATA 3837  
\*\*\*\*\*  
TrDcl1\_Choachi CGAGCCGTGCAGCTTACGACAGCGCCTCTGGCGGCGTATGCGAACCCCCACAAGTGCC 3775  
TrDcl1\_SC58 CGAGCCGTGCAGCTTACGACAGCGCCTCTGGCGGCGTATGCGAACCCCCACAAGTGCC 3897  
\*\*\*\*\*  
TrDcl1\_Choachi TCGAATGAAGAAGAGATGGACCAGTACCCTGTCGAGATGTCACACGCATCACTGCTGCGC 3835  
TrDcl1\_SC58 TCGAATGAAGAAGAGATGGACCAGTACCCTGTCGAGATGTCACACGCATCACTGCTGCGC 3957  
\*\*\*\*\*  
TrDcl1\_Choachi CTCACCTCCCTCCGCTGCGCTGAATACCGCGATGTGCAAGGGTTGAGCCGGCATGCGCTGG 3895  
TrDcl1\_SC58 CTCACCTCCCTCCGCTGCGCTGAATACCGCGATGTGCAAGGGTTGAGCCGGCATGCGCTGG 4017  
\*\*\*\*\*  
TrDcl1\_Choachi TGGGACGGCTGCGACGACAACCCAGTTTTGGAACTTTGACGCCATTGAGGCCATCGAT 3955  
TrDcl1\_SC58 TGGGACGGCTGCGACGACGACCCAGTTTTGGAACTTTGACGCCATTGAGGCCATCGAT 4077  
\*\*\*\*\*  
TrDcl1\_Choachi GACCGACTGAAGTCCTTTGGAGTATATCAGGCGTGCACAGCATCCCTGGCGCTGAGTGG 4015  
TrDcl1\_SC58 GACCGACTGAAGTCCTTTGGAGTATATCAGGCGTGCACAGCATCCCTGGCGCTGAGTGG 4137  
\*\*\*\*\*  
TrDcl1\_Choachi GTCGTTTGGCTTGACGCCATCTTTGGAATAGTGGCCGGCGATTCCGAAAACCTGTTGGAG 4075  
TrDcl1\_SC58 GTCGTTTGGCTTGACGCCATCTTTGGAATAGTGGCCGGCGATTCCGAAAACCTGTTGGAG 4197  
\*\*\*\*\*  
TrDcl1\_Choachi AATGAAAAGGTGAAGACCGCGCGCTGCAGCCCGCTACTGGAAGTTTGTAAAGGAGACC 4135  
TrDcl1\_SC58 AATGAAAAGGTGAAGACCGCGCGCTGCAGCCCGCTACTGGAAGTTTGTAAAGGAGACC 4257  
\*\*\*\*\*  
TrDcl1\_Choachi CGTCAGGCACATCTTTTGGTGGCGGGGAGGTGCTGCTTGGCGTGGCTCCTGTGAGTCC 4195  
TrDcl1\_SC58 CGTCAGGCACATCTTTTGGTGGCGGGGAGGTGCTGCTTGGCGTGGCTCCTGTGAGTCC 4317  
\*\*\*\*\*  
TrDcl1\_Choachi CTGCAACAGGCGCTGGAGCAGAGGCGCGCATGGAGACAATGGCGCGATGCCTAGTCCCC 4255  
TrDcl1\_SC58 CTGCAACAGGCGCTGGAGCAGAGGCGCGCATGGAGACAATGGCGCGATGCCTAGTCCCC 4377  
\*\*\*\*\*  
TrDcl1\_Choachi AACATCACGATAAAAAGATGTGCCGATGACCCAAAGTGGCTGACGGCGTACGCAAAGGAC 4315  
TrDcl1\_SC58 AACATCACGATAAAAAGATGCACCGATTGACCCAAAGTGGCTGACGGCGTACGCAAAGGAC 4437  
\*\*\*\*\*  
TrDcl1\_Choachi GTCTTCCCGTTGTTTCTTCCCTGCGCAAGAGGACCGTCCGCCCGCTGCAGCCCCAAA 4375  
TrDcl1\_SC58 GTCTTCCCGTTGTTTCTTCCCTGCGCAAGAGGACCGTCCGCCCGCTGCAGCCCCAAA 4497  
\*\*\*\*\*  
TrDcl1\_Choachi GAACAGGCTGGGTTTGGGATGAACACTGCCTCCCTAATCGCGGTGACGGGCACGAGCATC 4435  
TrDcl1\_SC58 GAACAGGCTGGGTTTGGGATGAACACTGCCTCCCTAATCGCGGTGACGGGCACGAGCATC 4557  
\*\*\*\*\*  
TrDcl1\_Choachi GACGGTGGCTTGACCAGATGGAGCAGCCAGCACAGCAGCACTCAACGGTGGCTTGCCA 4495  
TrDcl1\_SC58 GACGGTGGCTTGACCAGATGGAGCAGCCAGCACAGCAGCACTCAACGGTGGCTTGCCA 4617  
\*\*\*\*\*  
TrDcl1\_Choachi AACAGGTTGAGGCAGACCCCTGGAAGGACGGTGGCGCTGCTTCTAGACAACCTGGGATGGA 4555  
TrDcl1\_SC58 AACAGGTTGAGGCAGACTCCTGGAAGGACGGTGGCGCTGCTTCTAGACAACCTGGGATGGA 4677  
\*\*\*\*\*  
TrDcl1\_Choachi AGTGACCAGTCTATTGGCCAGGTCTATGCGGCGATTGTGTCGGCGTTTCGCGGATCGTAC 4615  
TrDcl1\_SC58 AGTGACCAGTCTATTGGCCAGGTCTATGCGGCGATTGTGTCGGCGTTTCGCGGATCGTAC 4737  
\*\*\*\*\*  
TrDcl1\_Choachi CGTCCCTCGCTATTGTCACTTCCGAAGAAGGGTTGTTTTGTTCCTTTCAAAGCAATTT 4675  
TrDcl1\_SC58 CGTCCCTCGCTATTGTCACTTCCGAAGAAGGGTTGTTTTGTTCCTTTCAAAGCAATTT 4797  
\*\*\*\*\*

```
TrDcl1_Choachi CCTTGC GTTGTGCCCCCAATATTTACAGCGCACGCCGTGAAAGGAGTCCATCGCGGG 4735
TrDcl1_SC58 CCTTGC GTTGTGCCCTCAATATTTACAGCGCACGCCGTGAAAGGAGTTCATCGCGGG 4857
*****
TrDcl1_Choachi GCACAGCATGTTTTGCCTACATCTTTGTTGTTGATGGTACGGCCAATCTGTACTGTAAT 4795
TrDcl1_SC58 GCACAGCATGTTTTGCCTACATCTTTGTTGTTGATGGTACGGCCAATCCGCACCGTAAT 4917
*****
TrDcl1_Choachi GAGAGCCTCATCGCGCAATATGGGAAGCTCTCGTAGTGAAAATCGGACGGATGTATGCC 4855
TrDcl1_SC58 GAGAGCCTCGTCGCGCAATATGGGAAGCTCTCGTGGTAAAACCGGACGGATGTATGCC 4977
*****
TrDcl1_Choachi TCCAGCGAGGCCATCTGAAAGTGCTTCTTTTGTAGCCTCACCGCCGTGACAACGATAA 4915
TrDcl1_SC58 TCCAGCGAGGCCATCCGAAAGTGCTTCTTTTGTAGCCTCACCGCCGTGACAACGATAA 5037
*****
TrDcl1_Choachi CAAAAAGCGTA-- 4926
TrDcl1_SC58 CAAAAAGCGTACA 5050
*****
```

|                |                                                               |      |
|----------------|---------------------------------------------------------------|------|
| TrRif4_Choachi | TGAGAACTACTGGCTGTGGCGGCAATGCTGGAGGGCGGGAAGGAAAGAACCATGAAGT    | 60   |
| TrRif4_SC58    | TGAGAACTACTGGCTGTGGCGGCAATGCTGGAGGGCGGGAAGGAAAGAACCATGAAGT    | 60   |
| TrRif4_Choachi | *****                                                         |      |
| TrRif4_Choachi | GGACGAAAAACATTAGACCGTTTGGGTTTTGTAATTTTTTTTTTTTTTCGATGATCAA    | 120  |
| TrRif4_SC58    | GGACGAAAAACATTAGACCGTTTGGGTTTTATG----TCTTTTTTTTTTCGATGATCAA   | 114  |
| TrRif4_Choachi | *****                                                         |      |
| TrRif4_Choachi | CAGGCCTGTAGTGCTACTTAGTGAGACTGGCGTC-TTTTTAAACCTTTTCTGGTGGCG    | 179  |
| TrRif4_SC58    | CAGGTCTGTAGTGCTACTTAGTGAGACTGACGTCCTTTTTAAACCTTTTCTGGTAGCG    | 174  |
| TrRif4_Choachi | *****                                                         |      |
| TrRif4_Choachi | GTGAATGGTGGGAATGAGAGCGGTTTTATTGTCATCTTTCAAACAAAATCAGGC        | 239  |
| TrRif4_SC58    | GGGAATGGTGGGAATGAGAGCGGTTTTATTGTCATCTTTCAAACAAAATCAAGCTC      | 234  |
| TrRif4_Choachi | *****                                                         |      |
| TrRif4_Choachi | AAAAACAAGAGCGGTTTTGCGTGTGTGTGTGTGTGTGTACTTATTCAGCTCCTTTCT     | 299  |
| TrRif4_SC58    | AAAAACAAGAGCGGTTTTGCGTGTGTGTGTGTGTGTGTG--TACTTATTCAGCTCCTTTCT | 292  |
| TrRif4_Choachi | *****                                                         |      |
| TrRif4_Choachi | TGACGACCTTAGGAACAAGGAAAGCAGCAGTGATGTTGACTCTGAAAGCAGCCCGAT     | 359  |
| TrRif4_SC58    | TGACGACCTCAGGAACAAGGAAAGCAGCAGTGATGTTGACTCTGAAATCGACCCCGAT    | 352  |
| TrRif4_Choachi | *****                                                         |      |
| TrRif4_Choachi | ATTAGTGCGCAGAGTACTGGAGACCATCTCTGATGATAACAGCGCTGATATGCAGGGG    | 419  |
| TrRif4_SC58    | ATTAGTGCGCAGAGTACTGGAGACCATCTCTGATGATAACAGCGCTGATATGCAGGGG    | 412  |
| TrRif4_Choachi | *****                                                         |      |
| TrRif4_Choachi | CCTCTTATCGAAGCTGTCGACAGAGCTACGAGCAGGAGCTGACAATCATGCGAGAGCA    | 479  |
| TrRif4_SC58    | CCTCTTATCGAAGCTGTCGACAGAGCTACGAGCAGGAGCTGACAATCATGCGAGAGCA    | 472  |
| TrRif4_Choachi | *****                                                         |      |
| TrRif4_Choachi | TCTCTTTACATCTTTGAGGACCTGAGGGTCCTTTTCAGCGGGCCTTTCCAGATCTCTAC   | 539  |
| TrRif4_SC58    | TCTCTTTACATCTTTGAGGACCTGAGGGTCCTTTTCAGCGGGCCTTTCCAGATCTCTAC   | 532  |
| TrRif4_Choachi | *****                                                         |      |
| TrRif4_Choachi | ACGCGGGATTCTGTGAGAGCCGGATTTAACTGATGTGCTCGAGGGGGCCTGTGATGAA    | 599  |
| TrRif4_SC58    | ACGCGGAATTCTGTGAGAGCCGGATTTAACTGATGTGCTCGAGGGGGCCTGTGATGAG    | 592  |
| TrRif4_Choachi | *****                                                         |      |
| TrRif4_Choachi | AGAAATACTGTGATAGTGAGCAGAGTTACGTTGGCAACACGCCCATCGCCGTTGTCA     | 659  |
| TrRif4_SC58    | AGAAATACTGTGATAGTGAGCAGAGTTACGTTGGCAACACGCCCATCGCCGTTGTCA     | 652  |
| TrRif4_Choachi | *****                                                         |      |
| TrRif4_Choachi | CCACGCCACCAGCATTTGATGTTCTCATGCAAGAGGATATTTGTCACGGAAAGAGGGCGTG | 719  |
| TrRif4_SC58    | CCACGCCACCAGCATTTGATGTTCTCATGCAAGAGGATATTTGTCACGGAAAGAGGGGTG  | 712  |
| TrRif4_Choachi | *****                                                         |      |
| TrRif4_Choachi | ACAATAAATCCGTCACCCGCTACGAGATTTATTTGTACACCCCGGCAAGTGCCTGCTTAT  | 779  |
| TrRif4_SC58    | ACAATAAATCCGTCACCCGCTACGAGATTTATTTGTACACCCCGGCAAGTGCCTGCTTAT  | 772  |
| TrRif4_Choachi | *****                                                         |      |
| TrRif4_Choachi | TGCTATTGAACCCACTATGAATCGCGCGGAAGTGCCTAAGAACACCGTGGAGGAGTATCC  | 839  |
| TrRif4_SC58    | TGCTATTGAACCCACTATGAATCGCGCGGAAGTGCCTAAGAACACCGTGGAGGAGTATCC  | 832  |
| TrRif4_Choachi | *****                                                         |      |
| TrRif4_Choachi | TGGAATATATTTTTATGTGGGATATATTTAAAGGTGAGCCTACGGGTTGGGCATTACTTCT | 899  |
| TrRif4_SC58    | TGGAATAGATTTTTATTTGGGATATATTTAAAGGTGAGCCTATGGGTTGGGCATTACTTCT | 892  |
| TrRif4_Choachi | *****                                                         |      |
| TrRif4_Choachi | CTCAGTGGATTGAGCCATTTGTCGAGAAGTTCAAAGTATGATCCGGTTAACCCTTTTCG   | 959  |
| TrRif4_SC58    | CTCAGTGGATTGAGCCATTTGTCGAGAAGTTCAAAGTATGATCCGGTTAACCCTTTTCG   | 952  |
| TrRif4_Choachi | *****                                                         |      |
| TrRif4_Choachi | GACGGACGATGATCGGATGATGTTCTTCCGGGAGCGCGTACGGGGAGAAAGGGTGGCTT   | 1019 |
| TrRif4_SC58    | GACGGACGATGATCGGATGATGTTCTTCCGGGAGCGCGTACGGGGAGAAAGGGTGGCTT   | 1012 |
| TrRif4_Choachi | *****                                                         |      |
| TrRif4_Choachi | GACGCCGCTGTCAAGGCTCCGAGTCAGCGCCCTAACCGTGGCCTTACCAAACGCATGCG   | 1079 |
| TrRif4_SC58    | GACGCCGCTGTCAAGGCTCCGACTCAGCGCCCTAACCGTGGCCTTACCAAACGCATGCG   | 1072 |
| TrRif4_Choachi | *****                                                         |      |
| TrRif4_Choachi | GGATGTTGCGGAGCTGACCGTCTTATTGGGACGTTGGAGGCCACTAAGGGCCATCCT     | 1139 |
| TrRif4_SC58    | GGATGTTGAGGAGCTTGCACGCTTATTGAGACGGTTGGAGGCCACTAAGGGCCATCCT    | 1132 |
| TrRif4_Choachi | *****                                                         |      |
| TrRif4_Choachi | TGTCCGCTCGATGTGGAAGCCGCGTTGTGCTTCCAGTGGGGTCTGCTTCCGTTGGA      | 1199 |
| TrRif4_SC58    | TGTCCGCTCGATGTGGAAGCCGCGTTGTGCTTCCAGTGGAGTTCCGTTCCGTTGGA      | 1192 |
| TrRif4_Choachi | *****                                                         |      |
| TrRif4_Choachi | GCTGGCGCTGATCCCTTGGCACCGAACATGAGTTGCAAAGTTTTCACTGTTTTCTTCA    | 1259 |
| TrRif4_SC58    | GCTGGCGCTGATCCCTTGGCACCGAACATGAGTTGCAAAGTTTTCACTGTTTTCTTCA    | 1252 |
| TrRif4_Choachi | *****                                                         |      |
| TrRif4_Choachi | CCCTGGTAGGGTTACAGATGAAGCTACTGCCTGTGCTTTGAGCTGTTGACACCTGAAGGG  | 1319 |
| TrRif4_SC58    | CCCTGGTAGGGTTACAGATGAAGCTACTGCCTGTGCTTTGAGCTGTTGACACCTGAAGGG  | 1312 |
| TrRif4_Choachi | *****                                                         |      |
| TrRif4_Choachi | AAGCCATTTTATACCTTTCTGTAATGCAAGCTTCTCCGTCACGATACACGGAAGTGGT    | 1379 |
| TrRif4_SC58    | AAGCCATTTTATACCTTTCTGTAATGCAAGCTTCTCCGTCACGATACACGGAAGTGGT    | 1372 |
| TrRif4_Choachi | *****                                                         |      |
| TrRif4_Choachi | GAGGACGCTTATTCCTTTGTAACCAATGAGTGTCTTTTTTGTAAACAAGGGTTCCAT     | 1439 |
| TrRif4_SC58    | GAGGACGCTTATTCCTTTGTAACCAATGAGGCGTCTTTTTTGTAAACAAGGGTTCCAT    | 1432 |
| TrRif4_Choachi | *****                                                         |      |
| TrRif4_Choachi | CATGGAGCTTACGCGCTGCGTGGGTGTTGGAGCAGCTCTGCGTTGGAGGGGAGTGA      | 1499 |
| TrRif4_SC58    | CATGGAGCTTACGCGCTGCGTGGGTGTTGGAGCAGCTCTGCGTTGGAGGGGAGTGA      | 1492 |
| TrRif4_Choachi | *****                                                         |      |
| TrRif4_Choachi | GTTCCCATACCGTCTTTCAAGAAATCTATTGCTTTGACATTGAAACCCTAACCAGT      | 1559 |
| TrRif4_SC58    | GTTCCCATACCGTCTTTCAAGAAATCTATTGCTTTGACATTGAAACCCTAACCAGT      | 1552 |
| TrRif4_Choachi | *****                                                         |      |
| TrRif4_Choachi | TTTCTCTCGGGGTGATGAAGACGGTGAGACGAATGCTGGGGATGGTACGGCGTTGGTA    | 1619 |
| TrRif4_SC58    | TTTCTCTCGGGGTGATGAAGACGGTGAGACGAATGCTGGGGATGGTACGGCGTTGGTA    | 1612 |
| TrRif4_Choachi | *****                                                         |      |

```
TrRif4_Choachi      CCATAGCAAGATGGAACGGATGATTTCTCAAGATGTAATTCAGATCCCACCCACACTG 1679
TrRif4_SC58         CCATAGCAAGATGGAACGGATGATTTCTCAAGATGTAATTCAGATCCCACCCACACTG 1672
*****
TrRif4_Choachi      CGCGTTACGGGATGCCGGGCGTCTCTATAACGAATTACGTCTTTGGTTGGGAATTTCCG 1739
TrRif4_SC58         CGCGTTACGGGATGCCGGGCGTCTCTATAACGAATTACGTCTTTGGTTGGGAATTTCCG 1732
*****
TrRif4_Choachi      TTCCATGGAAGCTAACGGACACTGAAGTCATGGAGAAGAACCAGAGTGGGA---- 1792
TrRif4_SC58         TTCCATGGAAGCTAACGGACACTGAAGACATGGAGAAGAACCAGAGTGGGAATCGA 1790
*****
```



TrRif5\_Choachi TGGACACGCGTGCAGAAAGCCCTGGACGCAAACACAATTGAACGAGACAATGTTATTGTT 60  
TrRif5\_SC58 TGGACACGCGTGCAGAAAGCCCTGGACGCAAACACAATTGAACGAGACAATGTTATTGTT 60  
\*\*\*\*\*  
TrRif5\_Choachi TCCATCAATGACATTGCCTGGATTGGGAAAAATGTATTTGTTGTATTTGTGCCAGCGTAC 120  
TrRif5\_SC58 TCCATCAATGCCATTGCCTGGATTGGGAAAAATGTATTTGTTGTATTTGTGCCAGCGTAC 120  
\*\*\*\*\*  
TrRif5\_Choachi AAGCGAAGGATTAGCTGCGAGCTGACGGCCGTGGATGTGCCACGCGGCACGGCCTCGGCC 180  
TrRif5\_SC58 AGCGAAGGATTAGCTGCGAGCTGACGGCCGTGGATGTGCCACGCGGCACGGCCTCGGCC 180  
\*\*\*\*\*  
TrRif5\_Choachi CTTGAGGAAAAAGTAAATGAGAACACTGAATGAAATTCGCTGTGCGCCGCACAGTATCGT 240  
TrRif5\_SC58 CTTGAGGAAAAAGTAAATGAGAACACTGAATGAAATTCGCTGTGCGCCGCACAGTATCCT 240  
\*\*\*\*\*  
TrRif5\_Choachi CGACAGGACCCTATGCCTTCTTCCAAATCAAGGCTACGGAGATATTATTTAGTATG 300  
TrRif5\_SC58 CGACAGGACCCTATGCCTTCTTCCAAATCAAGGCTACGGAGATATTATTTAGTATG 300  
\*\*\*\*\*  
TrRif5\_Choachi AGTGACAACGCTACACAGTAGTTTTCGTTGACAGGAGTCTTGTCTGCTGCGTGGGTTGGC 360  
TrRif5\_SC58 AGTGACAACGCTACACAGTAGTTTTCGTTGACAGGAGTCTTGTCTGCTGCGTGGGTTGGC 360  
\*\*\*\*\*  
TrRif5\_Choachi AGAATTTGTCGCTCCCATAGTTACACGACTGGAGGACGCTATACACGCGGAGTTGAAGGC 420  
TrRif5\_SC58 AGAATTTGTCGCTCCCATAGTTACACGACTGGAGGAACTTATACACGCGGAGTTGAAGGC 420  
\*\*\*\*\*  
TrRif5\_Choachi TCAAGGATCCTGGCGCATCCCCAGACGATCGTGAGCAGCCGAGTGTGTGGGCAAAAC 480  
TrRif5\_SC58 TCAAGGATCCTGGCGCATCCCCAGACGATCGTGAGCAGCCGAGTGTGTGGGCAAAAC 480  
\*\*\*\*\*  
TrRif5\_Choachi ATCATTAAAAATTTGAAAGCGGACCCGTTTCGCAAGCAATTGATAGGCCAACTAATAG 540  
TrRif5\_SC58 ATCATTAAAAATTTGAAAGCGGACCCGTTTCGCAAGCAATTGACAGGCCAAATAATAG 540  
\*\*\*\*\*  
TrRif5\_Choachi ATGTTTTCGCGGGTGATGTGTATGTGGTTCGCTGGGACGAGGGACAAGTTATGAGCGGCA 600  
TrRif5\_SC58 ATGTTTTCGCGGGTGATGTGTATGTGGTTCGCTGGGACGAGGGACAAGTTATGAGCGGCA 600  
\*\*\*\*\*  
TrRif5\_Choachi A-TGTACGAGTAAACAAAGTGGTAGCAAGGACTGGTACGCACACCACGAAGAGTGGC 659  
TrRif5\_SC58 A-TGTACGAGTAAACAAAGTGGTAGCAAGGACTGGTACGCACACCACGAAGAGTGGC 660  
\*\*\*\*\*  
TrRif5\_Choachi CACCGCGGCTTGTGGTTCTTGACGCTGTCAAGTGTTTTTCGTCGCGTACCAAGAATGGCT 719  
TrRif5\_SC58 CACCGCGGCTTGTGGTTCTTGACGCTGTCAAGTGTTTTTCGTCGCGTACCAAGAATGGCT 720  
\*\*\*\*\*  
TrRif5\_Choachi TTGCGCGCTGCGGTGGGCACAGAAGCGTCTTCTCTACTCCCGCGTTGAAGTCTGCATTC 779  
TrRif5\_SC58 TTGCGCGCTGCGGTGGGCACAGAAGCGTCTTCTCTACTCCCGCGTTGAAGTCTGCATTC 780  
\*\*\*\*\*  
TrRif5\_Choachi ACTCCACACACCCGTCGGAGAAGGACGTATCAAATAACACACAACCTTCTCTTATGAGC 839  
TrRif5\_SC58 ACTCCACACACCCGTCGGAGAAGGACGTATCAAATAACACACAACCTTCTCTTATGAGC 840  
\*\*\*\*\*  
TrRif5\_Choachi AATTGCGATGTGTGGGGTCAACTGTGTACGTGCTACCACGGGAATCTGGCCCGTGTGCGT 899  
TrRif5\_SC58 AATTGCGATGTGTGGGGTCAACTGTGTACGTGCTACCACGGGAATCTGGCCCGTGTGCGT 900  
\*\*\*\*\*  
TrRif5\_Choachi CTTCCACGAGGCAAGTCACCAATGTAGGTGTGCCTTAATTTCAAAGGGTCTCGGACTTC 959  
TrRif5\_SC58 CTTCCACGAGGCAAGTCACCAATGTAGGTGTGCCTTAATTTCAAAGGGTCTCGGACTTC 960  
\*\*\*\*\*  
TrRif5\_Choachi TTCGACAGGTTGTGGATACTGCGGTACCCGCTCAAGTGAATTTTCATGAACCTCTACGTT 1019  
TrRif5\_SC58 TTCGACAGGTTGTGGATACTGCGGTACCCGCTCAAGTGAATTTTCATGAACCTCTACGTT 1020  
\*\*\*\*\*  
TrRif5\_Choachi CTGCCAGGACCCGTTGTGCGCAGAGGCAGACGCGACACTGAAGGATGCAAAAACAGTCTT 1079  
TrRif5\_SC58 CTGCCAGGACCCGTTGTGCGCAGAGGCAGACGCGACACTGAAGGATGCAAAAACAGTCTT 1080  
\*\*\*\*\*  
TrRif5\_Choachi TATCATACGATTTGCCGATCTTCGATGATGGAGTCTCGTGCCTGCAAATGTTCCCTTG 1139  
TrRif5\_SC58 TATCATACGATTTGCCGATCTTCGATGATGGAGTCTCGTGCCTGCAAATGTTCCCTTG 1139  
\*\*\*\*\*  
TrRif5\_Choachi ATACGTGGTGCATCTCTTTCCCATCGCTGAAGACGCTGTGGCAGACCACAATGTGAGATG 1199  
TrRif5\_SC58 ATACGTGGTGCATCTCTTTCCCATCGCTGAAGACGCTGTGGCAGACCACAATGTGAGATG 1199  
\*\*\*\*\*  
TrRif5\_Choachi GAGATGTTTCATCGCAGTGCACGATACCCCCAACGCATTACAGTCTTCCGCCACTGC 1259  
TrRif5\_SC58 GAGATGTTTCATCGCAGTGCACGATACCCCCAACGCATTACAGTCTTCCGCCACTGC 1259  
\*\*\*\*\*  
TrRif5\_Choachi GAAGCCTCTGTGATATGAGCACACTGATACGTGAATGTGAGACCTTTGAGGGCTTTATCA 1319  
TrRif5\_SC58 GAAGCCTCTGTGATATGAGCACACTGATACGTGAAGTGTGAGACCTTTGAGGGCTTTATCA 1319  
\*\*\*\*\*  
TrRif5\_Choachi ATTCCGTGGCGTTAGTGCAGGAGTCTTGGTGGCTTTAGAGCAGCAGCAATGTCCGGC 1379  
TrRif5\_SC58 ATTCCGTGGCGTTAGTGCAGGAGTCTTGGTGGCTTTAGAGCAGCAGCAATGTCCGGC 1379  
\*\*\*\*\*  
TrRif5\_Choachi GTTGTCAAGTTCTTCGTTGGAATTAACGCTATTTTGTCTTTCGAGGATTCAGATA 1439  
TrRif5\_SC58 GTTGTCAAGTTCTTCGTTGGAATTAACGCTATTTTGTCTTTCGAGGATTCAGATA 1439  
\*\*\*\*\*  
TrRif5\_Choachi TCCTTGCCAGAGTTGAGGCAACACCCTTGGATCGGTTTGTCTTTATCCCACTGAAAAGA 1499  
TrRif5\_SC58 TCCTTGCCAGAGTTGAGGCAACACCCTTGGATCGGTTTGTCTTTATCCCACTGAAAAGA 1499  
\*\*\*\*\*  
TrRif5\_Choachi GTATCTTGGCAACACTGTGAGGAGTACAGTGGTATACGACAGGTGGCCTAGCGTCATTC 1559  
TrRif5\_SC58 GTATCTTGGCAACACTGTGAGGAGTACAGTGGTATACGACAGGTGGCCTAGCGTCATTC 1559  
\*\*\*\*\*  
TrRif5\_Choachi CTATTACAGAAACCGTTTACTTTACGTTGCGGTACCCGGGTATGTGTCGACGTCGTACG 1619  
TrRif5\_SC58 CTATTACAGAAACCGTTTACTTTACGTTGCGGTACCCGGGTATGTGTCGACGTCGTACG 1619  
\*\*\*\*\*

TrRif5\_Choachi ACCTACGAAACACATCCCAGCGATTCTCAGCACGAGCTGACCGTGAATAAGGAGCAA 1679  
TrRif5\_SC58 ACCCTACGAAACACATCCCAGCGATTCTCAGCACGAGCTGACCGTGAATAAGGAAACAA 1679  
\*\*\*\*\*  
TrRif5\_Choachi GGCATGGGACGAAGGTGATTAAGCTGAAACTTCAGATGATGAGATGAAATAATTTTC 1739  
TrRif5\_SC58 GGCATGGGACGAAGGTGATTAAGCTGAAACGTTTCAGATGATGAGATGAAATAATTTTC 1739  
\*\*\*\*\*  
TrRif5\_Choachi TTGTTGATGTTAGGGTGGAAATTTGTAACCACACTGAGCAGCTGAATCATCGGTGTGTGT 1799  
TrRif5\_SC58 TTGTTGATGTTAGGGTGGAAATTTGTAACCACACTGAGCAGCTGAATCATCGGTGTGTGT 1799  
\*\*\*\*\*  
TrRif5\_Choachi ATTTTCTCACCAGAGCGGCACGGGGCTCTGGTACCTCAGGCACGTGCTGTATGATGATG 1859  
TrRif5\_SC58 ATTTTCTCACCAGAGCGGCACGGGGCTCTGGTACCTCAGGCACGTGCTGTATGATGATG 1859  
\*\*\*\*\*  
TrRif5\_Choachi ATGACCTTGTAGTGTGGACGGTGGGAAATCCACTCCGCGTGTGGTAGTGACAGTGAAG 1919  
TrRif5\_SC58 ATGACCTTGTAGTGTGGACGGTGGGAAATCCACTCCGCGTGTGGTAGTGACAGTGAAG 1919  
\*\*\*\*\*  
TrRif5\_Choachi AGGAGTCTGACAGACAAAACGAGCAAAATCAAGGCGCGGAAGAGGAGGCCAGCAGGCA 1979  
TrRif5\_SC58 AGGAGTCTGACAGACAAAACGAGCAAAATCAAGGCGCGGAAGAGGAGGCCAGCAGGCA 1979  
\*\*\*\*\*  
TrRif5\_Choachi ATGATAATGAAACGCAATATAAAAAGAGAAATGGAGTCGTCGGAGATGTTTGTGCGTT 2039  
TrRif5\_SC58 ATGATAATGAAACGCAATATAAAAAGAGAAATGGAGTCGTCGGAGATGTTTGTGCGTT 2039  
\*\*\*\*\*  
TrRif5\_Choachi CGAGTGTGATTTTACTTTCAAGTGTACTGACTGACCGCGCATAAAGGGGGAGAAATCA 2099  
TrRif5\_SC58 CGAGTGTGATTTTACTTTCAAGTGTACTGACTGACCGCGCATAAAGGGGGAGAAATCA 2099  
\*\*\*\*\*  
TrRif5\_Choachi TCGGAGCCTGCGCGACTGGAGCAGACGCTCATGTACCGTGTGCGATGTGTGCCAA 2159  
TrRif5\_SC58 TCGGAGCCTGCGCGACTGGAGCAGACGCTCATGTACCGTGTGCGATGTGTGCCAA 2159  
\*\*\*\*\*  
TrRif5\_Choachi TGGGATTGGCCTGTGAATGGAGCTCGTGGGTTTTTGGGAGATGTGCTGTGATAAAGA 2219  
TrRif5\_SC58 TGGGATTGGCCTGTGAATGGAGCTCGTGGGTTTTTGGGAGATGTGCTGTGATAAAGA 2219  
\*\*\*  
TrRif5\_Choachi CCGAGGAGGAGGAAGAGAGGAGGGACACGTTGCTGCGGAGGACCAAAGTCTTTTTTTT 2279  
TrRif5\_SC58 CCGAGGAGGAGGAAGAGAGGAGGGACACGTTGCTGCGGAGGACCAAAGTCTTTTTTTT 2279  
\*\*\*\*\*  
TrRif5\_Choachi TT---ACGGTGGAAAAGAAGTAGCGTCCCGCGCTCATTATCAGCGTTAACAGGGGGGT 2336  
TrRif5\_SC58 TT---ACGGTGGAAAAGAAGTAGCGTCCCGCGCTCATTATCAGCGTTAACAGGGGGGT 2336  
\*\*  
TrRif5\_Choachi GATCGTGGACGGACACGACTCAGCTATTTGAGCAACACCATCGCAGACGTTGCAATGTT 2396  
TrRif5\_SC58 GATCGTGGACGGACACGACTCAGCTATTTGAGCAACACCATCGCAGACGTTGCAATGTT 2396  
\*\*\*\*\*  
TrRif5\_Choachi TTGTTAAGCGGGAGTTTGAGTACGGGACCTTCTGATAAAAAGCTAGGAACGTTGTTGATT 2456  
TrRif5\_SC58 TT---AAGCGGGAGTTTGAGTACGGGACCTTCTGATAAAAAGCTAGGAACGTTGTTGATT 2456  
\*\*  
TrRif5\_Choachi TTCCGTATGCGTGGAAAGTTATCTAAAACGGTGGATATTTGAGTTATGGAAGGGAACATG 2516  
TrRif5\_SC58 TTCCGTATGCGTGGAAAGTTATCTAAAACGGTGGATATTTGAGTTATGGAAGGGAACATG 2516  
\*  
TrRif5\_Choachi GTTTTGGATTCTGCGATATGTTTGGAGGAGTATGGTGTCTTTTGGCTTGGCGCAAGCCA 2576  
TrRif5\_SC58 GTTTTGGATTCTGCGATATGTTTGGAGGAGTATGGTGTCTTTTGGCTTGGCGCAAGCCA 2576  
\*\*\*\*\*  
TrRif5\_Choachi GTTGATGATGGCGGTGCCGTAATTTATGCCGAGGCGGGGAGAATGGAATGCTGGGACGAC 2636  
TrRif5\_SC58 GTTGATGATGGCGGTGCCGTAATTTATGCCGAGGCGGGGAGAATGGAATGCTGGGACGAC 2636  
\*\*\*\*\*  
TrRif5\_Choachi TCTGACACTACTGTTCCGCTGCGGGCCTACGACGACTGCCGTAGCCGCCAACTTGCAG 2696  
TrRif5\_SC58 TCTGACACTACTGTTCCGCTGCGGGCCTACGACGACTGCCGTAGCCGCCAACTTGCAG 2696  
\*\*\*\*\*  
TrRif5\_Choachi ACTGTTGCGTTTTCAAGGCCACGGCGCATCCTTTGGCTTCACTCACCATCATTTTTGCT 2756  
TrRif5\_SC58 ACTGTTGCGTTTTCAAGGCCACGGCGCATCCTTTGGCTTCACTCACCATCATTTTTGCT 2756  
\*\*\*\*\*  
TrRif5\_Choachi GCCCAGGGCTCCTTTGTCTGCGTTGTCTATTTTCCGCGTCAGCTTTTTGCGCGGTACC 2816  
TrRif5\_SC58 GCCCAGGGCTCCTTTGTCTGCGTTGTCTATTTTCCGCGTCAGCTTTTTGCGCGGTACC 2816  
\*  
TrRif5\_Choachi ACAAAACACATCGTGCCTTGGTGGCTAAGAACAACCTGGCCTTCATGAAGGAGGGTGGGG 2876  
TrRif5\_SC58 ACAAAACACATCGTGCCTTGGTGGCTAAGAACAACCTGGCCTTCATGAAGGAGGGTGGGA 2876  
\*\*\*\*\*  
TrRif5\_Choachi ATACTCAGTGGATGCGGCCTTTATTCGACTGCCCATCGTTTTTCCCAATCTTTTTG 2936  
TrRif5\_SC58 ATACTCAGTGGATGCGGCCTTTATTCGACTGCCCATCGTTTTTCCCAATCTTTTTG 2936  
\*\*  
TrRif5\_Choachi CCTCAAACCTTGAGCGCCTGCCAGCGGCTCGCAGAATGTGGAGCGGGCCTTTTGTGAAT 2996  
TrRif5\_SC58 CCTCAAACCTTGAGCGCCTGCCAGCGGCTCGCAGAATGTGGAGCGGGCCTTTTGTGAAT 2996  
\*\*\*\*\*  
TrRif5\_Choachi CGTTGCAACAAGGTGATGTGCCGCTCCGCCAACGCGCGGAGGTCGTATATTACGCAA 3056  
TrRif5\_SC58 CGTTGCAACAAGGTGATGTGCCGCTCCGCCAACGCGCGGAGGTCGTATATTACGCAA 3056  
\*\*\*\*\*  
TrRif5\_Choachi CACAAAAGCTTTTGTCTCTATTTTATCTATGCTTTTGTGCTGCTCAGCTGCGACGTGATA 3116  
TrRif5\_SC58 CACAAAAGCTTTTGTCTCTATTTTATCTATGCTTTTGTGCTGCTCAGCTGCGACGTGATA 3116  
\*\*\*\*\*  
TrRif5\_Choachi ATTCGGGAAAGGAATCCAGTGCAGAAACCCCGCACACGTCGGTATACAAGTTGCTGA 3176  
TrRif5\_SC58 ATTCGGGAAAGGAATCCAGTGCAGAAACCCCGCACACGTCGGTATACAAGTTGCTGA 3176  
\*\*\*\*\*  
TrRif5\_Choachi GGGATAAGTATGGTGCCTGTACGATGTGAAGATGTCCAGGTTTACTACTTCTCTGGTGC 3236  
TrRif5\_SC58 GGGATAAGTATGGTGCCTGTACGATGTGAAGATGTCCAGGTTTACTACTTCTCTGGTGC 3236  
\*\*\*\*\*

```

TrRif5_Choachi   TTTACAGGGTGGAGCCCAACTTAAACGCGAATGGGGATGGACAACACGGCAGCCTGCAT 3296
TrRif5_SC58      TTTACAGGGTGGAGCCCAACCTAAACGCGAATGGGGTGGACGACAACGGCAGCCTGCAT 3294
*****
TrRif5_Choachi   TATTTCTTGGATCTCATGACACAAAAACGAGTGACGCAATTTGAAGCCCCTGGCGACTTTA 3356
TrRif5_SC58      TATTTCTTGGATCTCATGACACAAAAACGAGTGACACATTTGAAGCCCCTGGCGACTTTA 3354
*****
TrRif5_Choachi   CGACATTGGGTAGAAAGTCCCTTGTCTCGTGCAGATTGAAGTGTGGGGTTGAATCACTTG 3416
TrRif5_SC58      CGACATTGGGTAGAAAGTCCCTTGTCTCGTGCAGATTGAAGTGTGGGGTTGAATCACTTG 3414
*****
TrRif5_Choachi   TTGCGCCTACTCCGGCTCGCCAGCCGACGATTTGACGAACACGACGATGACACTGTTT 3476
TrRif5_SC58      TTGCGCCTACTCCGGCTCGCCAGCCGACGATTTGACGAACACGACGATGACACTGTTT 3474
*****
TrRif5_Choachi   TACTAACGGAGTTGAGTGATGAGGAATGTCATCCTATGACTTCCCCTGGTGTCCGGCCTT 3536
TrRif5_SC58      TACTAACGGAGTTGAGTGATGAGGAATGTCATCCTATGACTTCCCCTGGTGTCCGGCCTT 3534
*****
TrRif5_Choachi   TGCCGTTAGCAAGCAGCACCCCAAGGCTTTACCATCCATTTCCGTGGCTCAGCCTTCTCG 3596
TrRif5_SC58      TGCCGTTAGCAAGCAGCACCCCAAGGCTTTACCATCCATTTCCGTGGCTCAGCCTTCTCG 3594
*****
TrRif5_Choachi   GCCAACCGTGCTTGTCTGAGATGAATACGACGCGAATCGTTGGGCAATCACGAATGG 3656
TrRif5_SC58      GCCAACCGTGCTTGTCTGAGATGAATACGACGCGAATCGTTGGGCAATCACGAATGG 3654
*****
TrRif5_Choachi   TTGCTGAGGGAGGCCAACTCGTTCGACGGCACATTGCGGTTTCATACTCAACTGTTTGT 3716
TrRif5_SC58      TTGCTGAGGGAGGCCAACTCGTTCGACGGCACATTGCGGTTTCATACTCAACTGTTTGT 3714
*****
TrRif5_Choachi   TGAGTAAAAGAAAATCATATTTATTTCCATTTCCATGAGTGCAGTGCCTGCTGATTT 3776
TrRif5_SC58      TGAGTAAAAGAAAATCATATTTATTTCCATTTCCATGAGTGCAGTGCCTGCTGATTT 3774
*****
TrRif5_Choachi   ATGGAATTGTGAAAAGACAAGCAGGGAAGGGTCCGCTATCATGAACTATTTATCTCTTC 3836
TrRif5_SC58      ATGGAATTGTGAAAAGACAAGCAGGGAAGGGTCCGCTATCATGAACTATTTATCTCTTC 3834
*****
TrRif5_Choachi   TGCTTCGTTCTGCAGCAGTACGAGCCGAGGGTGCCTCTCCGTTTGAGATGGAATCTTGA 3896
TrRif5_SC58      TGCTTCGTTCTGCAGCAGTACGAGCCGAGGGTGCCTCTCCGTTTGAGATGGAATCTTGA 3894
*****
TrRif5_Choachi   ATGTGTACGGCACGGCAGTGAACCGTTGTACC---TATTTATCAGTCTCGTCGACAAC 3953
TrRif5_SC58      ATGTGTACGGCACGGCAGTGAACCGTTGTACCCTTGTACCACCTATCTATCAGTCTCGTCGACAAC 3954
*****
TrRif5_Choachi   TTCGTTTTCGACTTGGCATGCTTTTGCCTTCTCTTTTGAAGGGAGGGGAAGACACGACGT 4013
TrRif5_SC58      TTCGTTTTCGACTTGGCATGCTTTTGCCTTCTCTTTTGAAGGGAGGGGAAGACACGACGT 4014
*****
TrRif5_Choachi   CTCCGACGGGCGCTGACGTGAAAGCCGAAGAGAAATTCCTACAACAGTTGTCCGAGGCAG 4073
TrRif5_SC58      CTCCGACGGGCGCTGACGTGAAAGCCGAAGAGAAATTCCTACAACAGTTGTCCGAGGCAG 4074
*****
TrRif5_Choachi   GGAAGCAGCTTCTTACTTGGTGGCGAAGCAGACAGCTGAACCATCGAGTTACGAGAGTG 4133
TrRif5_SC58      GGAAGCAGCTTCTTACTTGGTGGCGAAGCAGACAGCTGAACCATCGAGTTACGAGAGTG 4134
*****
TrRif5_Choachi   ACGATGGGAAACCTCCCGCAGCGGTACCTTAAAATAAATCTTGAACCTGATTCCTTCG 4193
TrRif5_SC58      ACGATGGGAAACCTCCCGCAGCGGTACCTTAAAATAAATCTTGAACCTGATTCCTTCG 4194
*****
TrRif5_Choachi   ACGGCGCAGGCAGGTGTATGTGGGTCTCTGTGTACCCCATCAAGAATGAACCAGAAACCA 4253
TrRif5_SC58      ACGGCGCAGGCAGGTGTATGTGGGTCTCTGTGTACCCCATCAAGAATGAACCAGAAACCA 4254
*****
TrRif5_Choachi   AGGGATATGTTGAGGCAGTTGGAACGCGGCCAATCCTCATCAGCAGTTTGACCTTGCGT 4313
TrRif5_SC58      AGGGATATGTTGAGGCAGTTGGAACGCGGCCAATCCTCATCAGCAGTTTGACCTTGCGT 4314
*****
TrRif5_Choachi   CCAATGTGTGGTCTCGATTCCCGCAGCACACTTCTCGTGAGGTATCGCCCGAGCAGC 4373
TrRif5_SC58      CCAATGTGTGGTCTCGATTCCCGCAGCACACTTCTCGTGAGGTATCGCCCGAGCAGC 4374
*****
TrRif5_Choachi   ACGAGTATGTTTTGCGTGGTCGGAAGCTGAAAACTGGCCCCAGTGGACGCTGAGGTGG 4433
TrRif5_SC58      ACGAGTATGTTTTGCGTGGTCGGAAGCTGAAAACTGGCCCCAGTGGACGCTGAGGTGG 4434
*****
TrRif5_Choachi   CCA 4436
TrRif5_SC58      CCA 4437
***

```
