# Supplementary material for: Genome of the Avirulent Human-Infective Trypanosome—Trypanosoma rangeli
Source: PubMed Central journal article supplement (PMC4169256; doi:10.1371/journal.pntd.0003176), 2014-09-18
Supplement: pntd.0003176.s005.pdf [file pntd.0003176.s005.pdf]

A)

1 90  
TrDCL2\_Choachi MNVGMARIHSELWSHMLPAKESRARGYATPDTDFV  
TrDCL2\_Sc58 MNVGMARIHSELWSHMLPAKESRARGYATPDTDFV  
TcIL3000.3.480 MLSSSEEGNAHLESNRQHTSANLSKTPQESTVRCRRRWVVKLALALFSLGKELHTEGKLAAFHGEIWSYELLGREALRRQYVPPDTRPK  
TcIL3000.0.20050 MLSSSEEGNAHLESNRQHTSANLSKTPQESTVRCRRRWVVKLALALFSLGKELHTEGKLAAFHGEIWSYELLGREALRRQYVPPDTRPK  
Tbg972.3.980 MIFGEDIQDQSVAVSCGSTNMVNNTPKEALVLQRRRWVMKLAVALFSLGKDLQSEGELESIHSEIWSYAAALGNEAVRRGYVPLGTPVA  
Tb427.03.1230 MIFGEDIQDQSVAVSCGSTNMVNNTPKEALVLQRRRWVMKLAVALFSLGKDLQSEGELESIHSEIWSYAAALGNEAVRRGYVPLGTPVA  
Tb927.3.1230 MIFGEDIQDQSVAVSCGSTNMVNDTPKEALVLQRRRWVMKLAVALFSLGKDLQSEGELESIHSEIWSYAAALGNEAVRRGYVPLGTPVA  
Consensus m...e.....s.....tp.e..v..rrgrwv.kla.alflsgk.l.eGk\$.a..HsEiWSy..Lg.Ea.rRgYvppdT.v.

91 180  
TrDCL2\_Choachi VTGSKWKQRLGIMWLKEGFGACVAELEPYFQREFLKLQEQTEPQEQVDITTAWTSDDPSAECRADI EACTTVASPLVSPALVGFERQLA  
TrDCL2\_Sc58 VTGSKWKQRLGIMWLKEGFGACVAELEPYFQREFLKLQEQTEPQEQVDITTAWTSDDPSAECRADI EACTTVASPLVSPALVGFERQLA  
TcIL3000.3.480 AAQNVWKEKIGAMYVDGGEACVRLDNLNPFYFEREFNRIQKKAEEERQITADT---ANTVACHAQVADATHSVGGFSSGSTVDSALVKYFA  
TcIL3000.0.20050 AAQNVWKEKIGAMYVDGGEACVRLDNLNPFYFEREFNRIQKKAEEERQITADT---ANTVACHAQVADATHSVGGFSSGSTVDSALVKYFA  
Tbg972.3.980 GAQSVWKRKLGELWLLEKGFEPFCMIQLEPYFQEFERLLAKGILKQSGTEK---DSNCSAVRPV-DTPEPARLSSRNNGAVEEFAKPLA  
Tb427.03.1230 GAQSVWKRKLGELWLLEKGFEPFCMIQLEPYFQEFERLLAKGILKQSGTEK---DSNCSAVRPV-DTPEPARLSSRNNGAVEEFAKPLA  
Tb927.3.1230 GAQSVWKRKLGELWLLEKGFEPFCMIQLEPYFQEFERLLAKGILKQSGTEK---DSNCSAVRPV-DTPEPARLSSRNNGAVEEFAKPLA  
Consensus .aqsvWK.klG.\$wl..GfEaCv.#L#PYF#rEF.rlq.k.e...Q....t....d...a..r.v.#a...v...s....a...f.k.lA

181 270  
TrDCL2\_Choachi RLFVAVLTFTRCPR-NLKEKQGWFSATAILQHLQCNDYG-RVKSNDGEAAEHTEAWMPPTPEQLVSLLLRLNLVRLRQFCW-----  
TrDCL2\_Sc58 RLFVAVLTFTRCPR-NLKEKQGWFSATAILQHLQCNDYG-RVKSNDGEAAEHTEAWMPPTPEQLVSLLLRLNLVRLRQFCW-----  
TcIL3000.3.480 KLYSDALRCVRGKCNDAE-GGWVAAGDLFASVSAHKAGYMMKASAIAEVERSTLFPPTTPSGLVNVLKLDLGRFQFRRLCGAESEP  
TcIL3000.0.20050 KLYSDALRCVRGKCNDAE-GGWVAAGDLFASVSAHKAGYMMKASAIAEVERSTLFPPTTPSGLVNVLKLDLGRFQFRRLCGAESEP  
Tbg972.3.980 SLYEASLRYLRSVGMKTTASTNGWVSAEELYSYLKDRKHSILVVKVDPDIIVSECDVLP--TTPARLLVVLSQLDLIGRLQFRWE--SKVDG  
Tb427.03.1230 SLYEASLRYLRSVGMKTTASTNGWVSAEELYSYLKDRKHSILVVKVDPDIIVSECDVLP--TTPARLLVVLSQLDLIGRLQFRWERSKVDG  
Tb927.3.1230 SLYEASLRYLRSVGMKTTASTNGWVSAEELYSYLKDRKHSILVVKVDPDIIVSECDVLP--TTPARLLVVLSQLDLIGRLQFRWERSKVDG  
Consensus .L%.a.Lr..R.v..n.....GWVSA..l...l...k.g..vK..d....E...lp.pTTP..Lv.vLs.L#llgRlQFrw.....

271 360  
TrDCL2\_Choachi ---GSRVKGAPAKTAGDVWVRAAWAHYARRIGDEVFESHPLPLEQVLSQFSSAVEFYDYIEHVDWFPSQVQKDHGGRTRSDFRPFLLLVS  
TrDCL2\_Sc58 ---GSRVKGAPAKTAGDVWVRAAWAHYARRIGDEVFESHPLPLEQVLSQFSSAVEFYDYIEHVDWFPSQVQKDHGGRTRSDFRPFLLLVS  
TcIL3000.3.480 TGEANGGAAEGLQEEKYSVRAAWAHKDSFMAQAVLSSHMPMTLKEAIDKFGRGKRLYDFVESLDRWRAELTKGG-RSVVFRPFLLL-A  
TcIL3000.0.20050 TGEANGGAAEGLQEEKYSVRAAWAHKDSFMAQAVLSSHMPMTLKEAIDKFGRGKRLYDFVESLDRWRAELTKGG-RSVVFRPFLLL-A  
Tbg972.3.980 KRDDERMSLGDEQECSSVRAAWAHKDSLASKVSDHPKMALEKALEIFSPCREIYDFVESVERWEATAKLHG-REIPTFRPFLML-A  
Tb427.03.1230 KRDDERMSLGDEQECSSVRAAWAHKDSLASKVSDHPKMALEKALEIFSPCREIYDFVESVERWEATAKLHG-REIPTFRPFLML-A  
Tb927.3.1230 KRDDERMSLGDEQECSSVRAAWAHKDSLASKVSDHPKMALEKALEIFSPCREIYDFVESVERWEATAKLHG-REIPTFRPFLML-A  
Consensus .....r...a....e..vs!RAAWAhk...a..V.sshP.\$..Le.al..Fs...e.YD%!Esv#rW.a..k.hG.R..p.FRPFL\$La

361 450  
TrDCL2\_Choachi VSLLCQGYERCEGMAWDTVLAANKITSNSAFVVRVKTFINLHRQRRVHVHP-----LPYSSAASGSPDEGVLLLLLSEMDSVITR  
TrDCL2\_Sc58 VSLLCQGYERCEGMAWDTVLAANKITSNSAFVVRVKTFINLHRQRRVHVHP-----LPYSSAASGSPDEGVLLLLLSEMDSVITR  
TcIL3000.3.480 VGDVIESRITGDCTQQAATLLSNKVVGSFAFLPIHEHFLNMHEECRVHVHSHFVNGVGVAVPFEAAPGGESCGVFLLPVSEIIPVGNVLK  
TcIL3000.0.20050 VGDVIESRITGDCTQQAATLLSNKVVGSFAFLPIHEHFLNMHEECRVHVHSHFVNGVGVAVPFEAAPGGESCGVFLLPVSEIIPVGNVLK  
Tbg972.3.980 VGDSIRARIPKDPVRRAAALLASKVTTKSAFLSVRSFGLHLQRPVVCVHSNIFEGGAMHLRQTAGHGQPPRGVLLHLSDIVYNAISN  
Tb427.03.1230 VGDSIRARIPKDPVRRAAALLASKVTTKSAFLSVRSFGLHLQRPVVCVHSNIFEGGAMHLRQTAGHGQPPRGVLLHLSDIVYNAISN  
Tb927.3.1230 VGDSIRARIPKDPVRRAAALLASKVTTKSAFLSVRSFGLHLQRPVVCVHSNIFEGGAMHLRQTAGHGQPPRGVLLHLSDIVYNAISN  
Consensus Vgd.i..ri..#.....aa.LlanK!ts.SAF1.!...Fln\$.#rrv.VVHs....g....p...A..G.p..gVllL.lS#i....!..

451 540  
TrDCL2\_Choachi --SSKGTKYIRAEALYGDGVSTETITVEALRLLNQKECEGSACTDNVKSIDISSSSGDGAQLCRFTWQLTQLCGQARATELSSKDDEVKN  
TrDCL2\_Sc58 --SSKGTKYIRAEALYGDGVSTETITVEALRLLNQKECEGSACTDNVKSIDISSSSGDGAQLCRFTWQLTQLCGQARATELSSKDDEVKN  
TcIL3000.3.480 NSENQILYVKGELY--GEA-QLRGVPLDALCLEAGEHSLGGD-----GAGGGVAVQSCRIVAVEVLDLPEVPQVSGSPALVNSN  
TcIL3000.0.20050 NSENQILYVKGELY--GEA-QLRGVPLDALCLEAGEHSLGGD-----GAGGGVAVQSCRIVAVEVLDLPEVPQVSGSPALVNSN  
Tbg972.3.980 VDTKRGAFLVKSEILYCGDAS-SVRSSEPIKSLCLETEPKTCTE-----PPS--TSALLFARLAEKSIITFNVPESPRVSSPTLANRI  
Tb427.03.1230 VDTKRGAFLVKSEILYCGDAS-SVRSSEPIKSLCLETEPKTCTE-----PPS--TSALLFARLAEKSIITFNVPESPRVSSPTLANRI  
Tb927.3.1230 VDTKRGAFLVKSEILYCGDAS-SVRSSEPIKSLCLETEPKTCTE-----PPS--TSALLFARLAEKSIITFNVPESPRVSSPTLANRI  
Consensus .....g.l%!k.EaLY..g.s...r.epl..Lcle..E.s.ct#.....g.s...a.q.cR.a.k...l..pa.....sSp.l.n.n

541 630  
TrDCL2\_Choachi GKTDKDNRLTQSLIYFDIEAALRCLRFVAAEASDAFAAYGEFDLGVVCSRWLAVGSSSLPCLANGNNLTATLSAVDAFAAPSLIWPICMR  
TrDCL2\_Sc58 GKTDKDNRLTQSLIYFDIEAALRCLRFVAAEASDAFAAYGEFDLGVVCSRWLAVGSSSLPCLANGNNLTATLSAVDAFAAPSLIWPICMR  
TcIL3000.3.480 VFDEKDTDELDPVAVWLQHLRYISQRLLLVTKESF--CKEWLEGI FDSYK--EDKSCEDEVSKMITN----VLSGSFEYAHSSLSLLVPRG  
TcIL3000.0.20050 VFDEKDTDELDPVAVWLQHLRYISQRLLLVTKESF--CKEWLEGI FDSYK--EDKSCEDEVSKMITN----VLSGSFEYAHSSLSLLVPRG  
Tbg972.3.980 LTLKRPTPTTNAATEFLCGLRSLSHGMGNFAREAF--FKKWIEDILALLRARNNRNGSDRSNSCRTPTTEKVLVSVTPDCVYTDVSLI IAGKQ  
Tb427.03.1230 LTLKRPTPTTNAATEFLCGLRSLSHGMGNFAREAF--FKKWIEDILALLRARNNRNGSDRSNSCRTPTTEKVLVSVTPDCVYTDVSLI IAGKQ  
Tb927.3.1230 LTLKRPTPTTNAATEFLCGLRSLSHGMGNFAREAF--FKKWIEDILALLRARNNRNGSDRSNSCRTPTTEKVLVSVTPDCVYTDVSLI IAGKQ  
Consensus .....k.....l..lr.s.#.va.Eaf..fk.w.E.il.....r.....gsd.s...n.....ls.s...a....sLi.p..r

## A) continued

631 720  
TrDCL2\_Choachi CSDGAVPYGRQVAMKELRVELRAGTFVPLYVSSQRQKQPFTVYFAQRTLAVNGGAPLATTPMVLLRPQRTVDVDRQTPAVSESEKAIIPRS  
TrDCL2\_Sc58 CSDGAVPYGRQVAMKELRVELRAGTFVPLYVSSQRQKQPFTVYFAQRTLAVNGGAPLATTPMVLLRPQRTVDVDRQTPAVSESEKAIIPRS  
TcIL3000.3.480 TGMRLSQKGPPL-ETLTNAAGRGECDPLYISANRQRQ-VVYFHADSPWGAD-QETVQQTVLLFLSSSQWEPGAEDEE-SGAKLSVDGR  
TcIL3000.0.20050 TGVRLSQKGRPPL-ETLTNAAGRGECDPLYISANRQRQ-VVYFHADSPWGAD-QETVQQTVLLFLSSSQWEPGAEDEE-GGAKLLVDGR  
Tbg972.3.980 KKDNSRPPGLRSLSKELINGIAEGGCDPLYIKSKQEGT-IVVYFQSTVSDERDVTEFFFSSPLLLLRSSYTVGDNEGKQ-TEETS VANH  
Tb427.03.1230 KKDNSRPPGLRSLSKELINGIAEGGCDPLYIKSKQEGT-IVVYFQSTVSDERDVTEFFFSSPLLLLRSSYTVGDNEGKQ-TEETS VANH  
Tb927.3.1230 KKDNSRPPGLRSLSKELINGIAEGGCDPLYIKSKQEGT-IVVYFQSTVSDERDVTEFFFSSPLLLLRSSYTVGDNEGKQ-TEETS VANH  
Consensus ..d...p.Gr..l.keL.n....G.cdPLY!ss.r#.q..vVYF.....g.#...e...tp\$llRss.tv.....se.e...!

721 810  
TrDCL2\_Choachi RAALVLSYISLQDDECGDGAVFIAIATELSEDEARVGRDRDYEDIHPDEDNHSDEGGALRWSAVIVDEWELEAAKPIAEVVEREFMLPLE  
TrDCL2\_Sc58 RAALVLSYISLQDDECGDGAVFIAIATELSEDEARVGRDRDYEDIHPDEDNHSDEGGALRWSAVIVDEWELEAAKPIAEVVEREFMLPLE  
TcIL3000.3.480 TAVLLLP-SKAQRKNGAGGDFFRTRTAVELSVQA---QSDAEAMYGI-----CGSTGSLRSVELLVDELAFEVLPITDIDVTMLLAPVK  
TcIL3000.0.20050 TAVLLLP-SKAQRKNGAGGDFFRTRTAVELSVQA---QSDAEAMYGI-----CGSTGSLRSVELLVDELAFEVLPITDIDVTMLLAPVK  
Tbg972.3.980 RSALFLR-VDKSSDSFAEGDTFRSLTVVELDREQ---KKVAEALRSD-----CNTEVTLRSVELCVDEWCLEVLVPLEKVVEECIFAPIK  
Tb427.03.1230 RSALFLR-VDKSSDSFAEGDTFRSLTVVELDREQ---KKVAEALRSD-----CNTEVTLRSVELCVDEWCLEVLVPLEKVVEECIFAPIK  
Tb927.3.1230 RSALFLR-VDKSSDSFAEGDTFRSLTVVELDREQ---KKVAEALRSD-----CNTEVTLRSVELCVDEWCLEVLVPLEKVVEEYIFAPIK  
Consensus raal.L.....q.d...a.Gd.Fr..t.vEld.aq.....daEa.....cg...g.LRsvel.VDEw.lEvl.Pi..!V#.....ap.k

811 900  
TrDCL2\_Choachi RSLCT-PNPACRFHNFVVEVDALLQSLRMQLLLAVTPQLNEKLEYVGDAILDFVVAQDKLSIWTAGRIVSESSNRRFVSYLPEVITHHL  
TrDCL2\_Sc58 RSLCT-PNPACRFHNFVVEVDALLQSLRMQLLLAVTPQLNEKLEYVGDAILDFVVAQDKLSIWTAGRIVSESSNRRFVSYLPEVITHHL  
TcIL3000.3.480 RSLSSGKDATLPFLSLPVEARATIIQSLRQYLLMAVQPLINETLEFLGDAVLDFVVAQETLNTWGGGPVAEATSNQLGRSLPLIRYY  
TcIL3000.0.20050 RSLSSGKDATLPFLSLPVEARATIIQSLRQYLLMAVQPLINETLEFLGDAVLDFVVAQETLNTWGGGPVAEATSNQLGRSLPLIRYY  
Tbg972.3.980 QCLYGRGNSESFFLLSEADQAKLEQSLMEQLLLAVTPVKNEALEYLGDAVLDFVVAQEKLNSTGGPIVDATCNASLAKCLFPQLRNYF  
Tb427.03.1230 QCLYGRGNSESFFLLSEADQAKLEQSLMEQLLLAVTPVKNEALEYLGDAVLDFVVAQEKLNSTGGPIVDATCNASLAKCLFPQLRNYF  
Tb927.3.1230 QCLYGRGNSESFFLLSEADQAKLEQSLMEQLLLAVTPVKNEALEYLGDAVLDFVVAQEKLNSTGGPIVDATCNASLAKCLFPQLRNYF  
Consensus rsL.....#...pFl.lpve.qa.l.QSLr.qLL\$AVT...NE.LE%LGDALDFVVAQ#kLn.WtgGp!v.atsN...l...Lp...l...y.

901 989  
TrDCL2\_Choachi RLVWHIGNEARKADVVALFGAVMALWVIPPYSGVARGPLS-----AAGRLPFTCVLQVVRELM SVLQVVVT  
TrDCL2\_Sc58 RLVWHIGNEARKADVVALFGAVMALWVIPPYSGVARGPLS-----AAGRLPFTCVLQVVRELM SVLHVVT  
TcIL3000.3.480 ELKFKITNKRHADTVVAIFGALAMVLWVIFRDEGKHTAD-----GPLPFSVLQCVTRDLMTALGICAQAEETEPSDQP  
TcIL3000.0.20050 ELKFKITNKRHADTVVAIFGALAMVLWVIFRDEGKHTAD-----GPLPFSVLQCVTRDLMTALGICAQAEETEPSDQP  
Tbg972.3.980 EMKLGISNQIQADMVAIFGAVMALWVIPRKKVLESSTDTTGTGGGGETPAAGGLLPFAALLSVTKALMDALNITTO  
Tb427.03.1230 EMKLGISNQIQADMVAIFGAVMALWVIPRKKVLESSTDTTGTGGGGETPAAGGLLPFAALLSVTKALMDALNITTO  
Tb927.3.1230 EMKLGISNQIQADMVAIFGAVMALWVIPRKKVLESSTDTTGTGGGGETPAAGGLLPFAALLSVTKALMDALNITTO  
Consensus e\$K..I.N.KR.AD.VEAiFGAVaMaLWVIP.rgv.....d.....a.G.LPF..ll.Vtr.LM.aL.!...q.....

## B)

| Organism               |                  | <i>T. rangeli</i> |         | <i>T. congolense</i> |                  | <i>T. b. gambiense</i> | <i>T. b. brucei</i> |               |
|------------------------|------------------|-------------------|---------|----------------------|------------------|------------------------|---------------------|---------------|
|                        |                  | Sc-58             | Choachi | TcIL3000.3.480       | TcIL3000.0.20050 | Tbg972.3.980           | Tb927.3.1230        | Tb427.03.1230 |
| <i>T. rangeli</i>      | Sc-58            | 100               |         |                      |                  |                        |                     |               |
|                        | Choachi          | 99                | 100     |                      |                  |                        |                     |               |
| <i>T. congolense</i>   | TcIL3000.3.480   | 26                | 26      | 100                  |                  |                        |                     |               |
|                        | TcIL3000.0.20050 | 25                | 25      | 97                   | 100              |                        |                     |               |
| <i>T. b. gambiense</i> | Tbg972.3.980     | 29                | 29      | 36                   | 36               | 100                    |                     |               |
| <i>T. b. brucei</i>    | Tb927.3.1230     | 29                | 29      | 36                   | 36               | 99                     | 100                 |               |
|                        | Tb427.03.1230    | 29                | 29      | 36                   | 36               | 98                     | 98                  | 100           |
